# Supplementary material for: Sexual Dimorphism in Gene Expression: A Genome-Wide Study of Tissue and Chromosome Dependencies
Source: Research Square preprint supplement (doi:10.21203/rs.3.rs-6481775/v1), 2025-04-30
Supplement: Supplementary file 1 [file ea4316525ca01ae44a33b280.docx]

**Table S1. GO-KEEG enriched items across tissues in autosomal chromosomes**

| ONTOLOGY | ID | | Description | Gene  Ratio | p  value | p.  adjust |
| --- | --- | --- | --- | --- | --- | --- |
| adrenal | | | | | | |
| BP | | GO:0050808 | synapse organization | 116/2495 | 1.18E-23 | 7.35E-20 |
| BP | | GO:0099003 | vesicle-mediated transport in synapse | 75/2495 | 6.11E-22 | 1.90E-18 |
| BP | | GO:0007264 | small GTPase mediated signal transduction | 102/2495 | 3.25E-21 | 6.72E-18 |
| BP | | GO:0006836 | neurotransmitter transport | 71/2495 | 1.14E-20 | 1.77E-17 |
| BP | | GO:0033674 | positive regulation of kinase activity | 101/2495 | 2.24E-20 | 2.78E-17 |
| BP | | GO:0001505 | regulation of neurotransmitter levels | 72/2495 | 5.34E-20 | 5.52E-17 |
| BP | | GO:0099504 | synaptic vesicle cycle | 67/2495 | 9.71E-20 | 8.61E-17 |
| BP | | GO:0060562 | epithelial tube morphogenesis | 92/2495 | 8.96E-19 | 6.95E-16 |
| BP | | GO:0045860 | positive regulation of protein kinase activity | 85/2495 | 5.39E-18 | 3.15E-15 |
| BP | | GO:0007269 | neurotransmitter secretion | 57/2495 | 5.81E-18 | 3.15E-15 |
| CC | | GO:0098793 | presynapse | 126/2530 | 1.36E-28 | 9.54E-26 |
| CC | | GO:0098978 | glutamatergic synapse | 92/2530 | 7.91E-25 | 2.78E-22 |
| CC | | GO:0097060 | synaptic membrane | 101/2530 | 1.26E-23 | 2.95E-21 |
| CC | | GO:0098984 | neuron to neuron synapse | 93/2530 | 1.10E-21 | 1.93E-19 |
| CC | | GO:0032279 | asymmetric synapse | 87/2530 | 2.95E-20 | 4.15E-18 |
| CC | | GO:0014069 | postsynaptic density | 85/2530 | 6.24E-20 | 7.31E-18 |
| CC | | GO:0099572 | postsynaptic specialization | 88/2530 | 1.14E-19 | 1.14E-17 |
| CC | | GO:0150034 | distal axon | 90/2530 | 7.77E-19 | 6.83E-17 |
| CC | | GO:0030133 | transport vesicle | 80/2530 | 2.35E-18 | 1.83E-16 |
| CC | | GO:0043235 | receptor complex | 96/2530 | 3.10E-18 | 2.18E-16 |
| MF | | GO:0030695 | GTPase regulator activity | 98/2470 | 1.47E-19 | 8.66E-17 |
| MF | | GO:0060589 | nucleoside-triphosphatase regulator activity | 98/2470 | 1.47E-19 | 8.66E-17 |
| MF | | GO:0005096 | GTPase activator activity | 63/2470 | 4.21E-16 | 1.65E-13 |
| MF | | GO:0015631 | tubulin binding | 84/2470 | 3.35E-15 | 9.84E-13 |
| MF | | GO:0050839 | cell adhesion molecule binding | 71/2470 | 1.87E-14 | 4.40E-12 |
| MF | | GO:0000149 | SNARE binding | 39/2470 | 1.35E-13 | 2.64E-11 |
| MF | | GO:0004674 | protein serine/threonine kinase activity | 87/2470 | 4.06E-13 | 6.30E-11 |
| MF | | GO:0008017 | microtubule binding | 63/2470 | 4.29E-13 | 6.30E-11 |
| MF | | GO:0019905 | syntaxin binding | 30/2470 | 1.14E-12 | 1.49E-10 |
| MF | | GO:0022836 | gated channel activity | 68/2470 | 7.05E-12 | 8.28E-10 |
| KEGG | | mmu04010 | MAPK signaling pathway | 69/1118 | 7.34E-08 | 2.38E-05 |
| KEGG | | mmu04015 | Rap1 signaling pathway | 50/1118 | 5.37E-06 | 8.11E-04 |
| KEGG | | mmu04020 | Calcium signaling pathway | 54/1118 | 7.51E-06 | 8.11E-04 |
| KEGG | | mmu04725 | Cholinergic synapse | 30/1118 | 2.74E-05 | 1.53E-03 |
| KEGG | | mmu05032 | Morphine addiction | 26/1118 | 2.77E-05 | 1.53E-03 |
| KEGG | | mmu00230 | Purine metabolism | 34/1118 | 2.84E-05 | 1.53E-03 |
| KEGG | | mmu04151 | PI3K-Akt signaling pathway | 71/1118 | 3.50E-05 | 1.57E-03 |
| KEGG | | mmu04713 | Circadian entrainment | 27/1118 | 3.99E-05 | 1.57E-03 |
| KEGG | | mmu05210 | Colorectal cancer | 25/1118 | 4.37E-05 | 1.57E-03 |
| KEGG | | mmu04130 | SNARE interactions in vesicular transport | 13/1118 | 8.13E-05 | 2.63E-03 |
| amygdala | | | | | | |
| BP | | GO:0043268 | positive regulation of potassium ion transport | 2/12 | 2.00E-04 | 4.43E-02 |
| MF | | GO:0008504 | monoamine transmembrane transporter activity | 1/11 | 3.88E-03 | 4.88E-02 |
| MF | | GO:0015378 | sodium:chloride symporter activity | 1/11 | 4.27E-03 | 4.88E-02 |
| MF | | GO:0015269 | calcium-activated potassium channel activity | 1/11 | 4.66E-03 | 4.88E-02 |
| MF | | GO:1901338 | catecholamine binding | 1/11 | 4.66E-03 | 4.88E-02 |
| MF | | GO:0015373 | anion:sodium symporter activity | 1/11 | 5.05E-03 | 4.88E-02 |
| MF | | GO:0005326 | neurotransmitter transmembrane transporter activity | 1/11 | 6.59E-03 | 4.88E-02 |
| MF | | GO:0015377 | cation:chloride symporter activity | 1/11 | 6.98E-03 | 4.88E-02 |
| MF | | GO:0043176 | amine binding | 1/11 | 7.37E-03 | 4.88E-02 |
| MF | | GO:0015296 | anion:cation symporter activity | 1/11 | 8.53E-03 | 4.88E-02 |
| MF | | GO:0005242 | inward rectifier potassium channel activity | 1/11 | 8.91E-03 | 4.88E-02 |
| MF | | GO:0005227 | calcium activated cation channel activity | 1/11 | 9.68E-03 | 4.88E-02 |
| MF | | GO:0051537 | 2 iron, 2 sulfur cluster binding | 1/11 | 1.01E-02 | 4.88E-02 |
| MF | | GO:0005184 | neuropeptide hormone activity | 1/11 | 1.08E-02 | 4.88E-02 |
| MF | | GO:0046873 | metal ion transmembrane transporter activity | 2/11 | 1.11E-02 | 4.88E-02 |
| MF | | GO:0051393 | alpha-actinin binding | 1/11 | 1.16E-02 | 4.88E-02 |
| hypothalamus | | | | | | |
| BP | | GO:0051965 | positive regulation of synapse assembly | 3/19 | 1.93E-05 | 9.97E-03 |
| BP | | GO:0051963 | regulation of synapse assembly | 3/19 | 6.66E-05 | 9.97E-03 |
| BP | | GO:1901890 | positive regulation of cell junction assembly | 3/19 | 7.17E-05 | 9.97E-03 |
| BP | | GO:0060749 | mammary gland alveolus development | 2/19 | 9.44E-05 | 9.97E-03 |
| BP | | GO:0061377 | mammary gland lobule development | 2/19 | 9.44E-05 | 9.97E-03 |
| BP | | GO:0007416 | synapse assembly | 3/19 | 2.65E-04 | 2.33E-02 |
| BP | | GO:2000241 | regulation of reproductive process | 3/19 | 3.39E-04 | 2.56E-02 |
| BP | | GO:1901888 | regulation of cell junction assembly | 3/19 | 3.89E-04 | 2.57E-02 |
| BP | | GO:0032355 | response to estradiol | 2/19 | 5.56E-04 | 2.85E-02 |
| BP | | GO:0045777 | positive regulation of blood pressure | 2/19 | 5.99E-04 | 2.85E-02 |
| MF | | GO:0004879 | nuclear receptor activity | 2/17 | 4.60E-04 | 2.07E-02 |
| MF | | GO:0098531 | ligand-activated transcription factor activity | 2/17 | 4.60E-04 | 2.07E-02 |
| MF | | GO:0042562 | hormone binding | 2/17 | 1.24E-03 | 3.71E-02 |
| CC | | GO:0032590 | dendrite membrane | 2/19 | 4.98E-04 | 3.14E-02 |
| CC | | GO:0032589 | neuron projection membrane | 2/19 | 1.03E-03 | 3.24E-02 |
| kidney | | | | | | |
| BP | | GO:0006631 | fatty acid metabolic process | 132/2309 | 2.06E-41 | 1.27E-37 |
| BP | | GO:0044282 | small molecule catabolic process | 108/2309 | 6.00E-38 | 1.85E-34 |
| BP | | GO:0006820 | anion transport | 126/2309 | 4.84E-32 | 9.95E-29 |
| BP | | GO:0046395 | carboxylic acid catabolic process | 77/2309 | 3.79E-30 | 5.85E-27 |
| BP | | GO:0010876 | lipid localization | 115/2309 | 7.57E-30 | 7.85E-27 |
| BP | | GO:0016054 | organic acid catabolic process | 77/2309 | 7.63E-30 | 7.85E-27 |
| BP | | GO:0008202 | steroid metabolic process | 95/2309 | 3.55E-28 | 3.12E-25 |
| BP | | GO:0006869 | lipid transport | 103/2309 | 5.11E-28 | 3.94E-25 |
| BP | | GO:0015711 | organic anion transport | 94/2309 | 5.77E-26 | 3.95E-23 |
| BP | | GO:1901605 | alpha-amino acid metabolic process | 65/2309 | 8.57E-26 | 5.29E-23 |
| CC | | GO:0045177 | apical part of cell | 141/2333 | 2.59E-42 | 1.82E-39 |
| CC | | GO:0016324 | apical plasma membrane | 118/2333 | 2.86E-40 | 1.01E-37 |
| CC | | GO:0009925 | basal plasma membrane | 91/2333 | 1.82E-32 | 4.28E-30 |
| CC | | GO:0045178 | basal part of cell | 95/2333 | 4.04E-32 | 7.06E-30 |
| CC | | GO:0044391 | ribosomal subunit | 75/2333 | 5.00E-32 | 7.06E-30 |
| CC | | GO:0022626 | cytosolic ribosome | 56/2333 | 1.03E-31 | 1.21E-29 |
| CC | | GO:0016323 | basolateral plasma membrane | 83/2333 | 1.58E-30 | 1.59E-28 |
| CC | | GO:0005840 | ribosome | 78/2333 | 4.33E-28 | 3.82E-26 |
| CC | | GO:0062023 | collagen-containing extracellular matrix | 96/2333 | 8.27E-23 | 6.48E-21 |
| CC | | GO:0045121 | membrane raft | 93/2333 | 2.36E-21 | 1.67E-19 |
| MF | | GO:0003735 | structural constituent of ribosome | 71/2305 | 3.17E-34 | 3.67E-31 |
| MF | | GO:0005319 | lipid transporter activity | 58/2305 | 1.12E-22 | 6.48E-20 |
| MF | | GO:0016614 | oxidoreductase activity, acting on CH-OH group of donors | 56/2305 | 3.02E-21 | 1.08E-18 |
| MF | | GO:0016616 | oxidoreductase activity, acting on the CH-OH group of donors, NAD or NADP as acceptor | 54/2305 | 3.74E-21 | 1.08E-18 |
| MF | | GO:0022804 | active transmembrane transporter activity | 93/2305 | 5.44E-21 | 1.26E-18 |
| MF | | GO:0008509 | anion transmembrane transporter activity | 78/2305 | 1.93E-19 | 3.72E-17 |
| MF | | GO:1901681 | sulfur compound binding | 73/2305 | 4.26E-19 | 7.03E-17 |
| MF | | GO:0015291 | secondary active transmembrane transporter activity | 66/2305 | 7.61E-19 | 1.10E-16 |
| MF | | GO:0008514 | organic anion transmembrane transporter activity | 56/2305 | 1.82E-18 | 2.33E-16 |
| MF | | GO:0016627 | oxidoreductase activity, acting on the CH-CH group of donors | 31/2305 | 3.17E-17 | 3.54E-15 |
| KEGG | | mmu03010 | Ribosome | 64/1293 | 4.59E-13 | 1.51E-10 |
| KEGG | | mmu04146 | Peroxisome | 36/1293 | 4.26E-10 | 4.87E-08 |
| KEGG | | mmu05171 | Coronavirus disease - COVID-19 | 73/1293 | 4.44E-10 | 4.87E-08 |
| KEGG | | mmu03050 | Proteasome | 24/1293 | 2.82E-09 | 2.32E-07 |
| KEGG | | mmu00071 | Fatty acid degradation | 25/1293 | 6.57E-09 | 4.32E-07 |
| KEGG | | mmu04142 | Lysosome | 44/1293 | 5.32E-08 | 2.92E-06 |
| KEGG | | mmu00280 | Valine, leucine and isoleucine degradation | 25/1293 | 6.61E-08 | 3.11E-06 |
| KEGG | | mmu01240 | Biosynthesis of cofactors | 47/1293 | 1.16E-07 | 4.76E-06 |
| KEGG | | mmu00410 | beta-Alanine metabolism | 17/1293 | 2.84E-07 | 1.04E-05 |
| KEGG | | mmu00980 | Metabolism of xenobiotics by cytochrome P450 | 28/1293 | 3.41E-07 | 1.12E-05 |
| liver | | | | | | |
| BP | | GO:0006631 | fatty acid metabolic process | 71/1338 | 8.07E-20 | 4.54E-16 |
| BP | | GO:0008202 | steroid metabolic process | 60/1338 | 2.73E-19 | 7.69E-16 |
| BP | | GO:0120254 | olefinic compound metabolic process | 40/1338 | 1.69E-18 | 3.18E-15 |
| BP | | GO:0071466 | cellular response to xenobiotic stimulus | 42/1338 | 2.27E-18 | 3.19E-15 |
| BP | | GO:0009410 | response to xenobiotic stimulus | 57/1338 | 3.87E-18 | 4.35E-15 |
| BP | | GO:0006805 | xenobiotic metabolic process | 33/1338 | 1.48E-16 | 1.39E-13 |
| BP | | GO:0016054 | organic acid catabolic process | 43/1338 | 1.10E-15 | 7.85E-13 |
| BP | | GO:0044282 | small molecule catabolic process | 54/1338 | 1.12E-15 | 7.85E-13 |
| BP | | GO:0046395 | carboxylic acid catabolic process | 42/1338 | 4.00E-15 | 2.50E-12 |
| BP | | GO:0001676 | long-chain fatty acid metabolic process | 31/1338 | 8.15E-15 | 4.59E-12 |
| CC | | GO:0062023 | collagen-containing extracellular matrix | 54/1346 | 1.98E-12 | 1.21E-09 |
| CC | | GO:0045177 | apical part of cell | 53/1346 | 1.23E-08 | 3.60E-06 |
| CC | | GO:0031253 | cell projection membrane | 40/1346 | 1.77E-08 | 3.60E-06 |
| CC | | GO:0045121 | membrane raft | 43/1346 | 2.47E-07 | 3.16E-05 |
| CC | | GO:0098857 | membrane microdomain | 43/1346 | 2.65E-07 | 3.16E-05 |
| CC | | GO:0016324 | apical plasma membrane | 41/1346 | 3.11E-07 | 3.16E-05 |
| CC | | GO:0043235 | receptor complex | 43/1346 | 1.79E-06 | 1.56E-04 |
| CC | | GO:0043197 | dendritic spine | 26/1346 | 2.12E-06 | 1.62E-04 |
| CC | | GO:0005604 | basement membrane | 19/1346 | 2.75E-06 | 1.87E-04 |
| CC | | GO:0044309 | neuron spine | 26/1346 | 3.39E-06 | 1.95E-04 |
| MF | | GO:0004497 | monooxygenase activity | 35/1327 | 3.22E-15 | 3.34E-12 |
| MF | | GO:0016614 | oxidoreductase activity, acting on CH-OH group of donors | 34/1327 | 2.10E-13 | 1.09E-10 |
| MF | | GO:0016705 | oxidoreductase activity, acting on paired donors, with incorporation or reduction of molecular oxygen | 40/1327 | 4.57E-13 | 1.37E-10 |
| MF | | GO:0046906 | tetrapyrrole binding | 34/1327 | 6.24E-13 | 1.37E-10 |
| MF | | GO:0020037 | heme binding | 33/1327 | 6.62E-13 | 1.37E-10 |
| MF | | GO:0016712 | oxidoreductase activity, acting on paired donors, with incorporation or reduction of molecular oxygen, reduced flavin or flavoprotein as one donor, and incorporation of one atom of oxygen | 22/1327 | 3.19E-12 | 5.51E-10 |
| MF | | GO:0016616 | oxidoreductase activity, acting on the CH-OH group of donors, NAD or NADP as acceptor | 31/1327 | 5.41E-12 | 8.02E-10 |
| MF | | GO:0005506 | iron ion binding | 32/1327 | 1.62E-11 | 2.10E-09 |
| MF | | GO:1901681 | sulfur compound binding | 42/1327 | 4.51E-11 | 5.20E-09 |
| MF | | GO:0008395 | steroid hydroxylase activity | 20/1327 | 9.29E-11 | 9.64E-09 |
| KEGG | | mmu00140 | Steroid hormone biosynthesis | 24/789 | 7.59E-07 | 2.44E-04 |
| KEGG | | mmu00071 | Fatty acid degradation | 15/789 | 2.48E-05 | 3.49E-03 |
| KEGG | | mmu00770 | Pantothenate and CoA biosynthesis | 9/789 | 3.26E-05 | 3.49E-03 |
| KEGG | | mmu00590 | Arachidonic acid metabolism | 19/789 | 1.28E-04 | 1.03E-02 |
| KEGG | | mmu01212 | Fatty acid metabolism | 15/789 | 2.25E-04 | 1.25E-02 |
| KEGG | | mmu00830 | Retinol metabolism | 20/789 | 2.33E-04 | 1.25E-02 |
| KEGG | | mmu05222 | Small cell lung cancer | 19/789 | 3.74E-04 | 1.72E-02 |
| KEGG | | mmu05204 | Chemical carcinogenesis - DNA adducts | 17/789 | 8.38E-04 | 3.36E-02 |
| KEGG | | mmu00982 | Drug metabolism - cytochrome P450 | 15/789 | 1.05E-03 | 3.74E-02 |
| KEGG | | mmu04142 | Lysosome | 23/789 | 1.42E-03 | 4.40E-02 |
| pituitary | | | | | | |
| BP | | GO:0031346 | positive regulation of cell projection organization | 109/2177 | 6.61E-29 | 4.00E-25 |
| BP | | GO:0034765 | regulation of ion transmembrane transport | 113/2177 | 1.18E-26 | 3.56E-23 |
| BP | | GO:0050808 | synapse organization | 112/2177 | 2.13E-26 | 4.31E-23 |
| BP | | GO:0034329 | cell junction assembly | 103/2177 | 1.91E-25 | 2.90E-22 |
| BP | | GO:0042391 | regulation of membrane potential | 104/2177 | 8.54E-24 | 1.03E-20 |
| BP | | GO:0010959 | regulation of metal ion transport | 99/2177 | 9.61E-23 | 9.70E-20 |
| BP | | GO:0007409 | axonogenesis | 104/2177 | 4.87E-22 | 4.21E-19 |
| BP | | GO:0016358 | dendrite development | 79/2177 | 1.16E-21 | 8.14E-19 |
| BP | | GO:0031589 | cell-substrate adhesion | 87/2177 | 1.21E-21 | 8.14E-19 |
| BP | | GO:0050767 | regulation of neurogenesis | 96/2177 | 1.91E-20 | 1.16E-17 |
| CC | | GO:0098793 | presynapse | 110/2195 | 5.94E-25 | 3.85E-22 |
| CC | | GO:0098984 | neuron to neuron synapse | 90/2195 | 3.51E-24 | 1.14E-21 |
| CC | | GO:0150034 | distal axon | 88/2195 | 9.36E-22 | 2.02E-19 |
| CC | | GO:0032279 | asymmetric synapse | 82/2195 | 3.01E-21 | 4.88E-19 |
| CC | | GO:0097060 | synaptic membrane | 88/2195 | 1.50E-20 | 1.95E-18 |
| CC | | GO:0014069 | postsynaptic density | 78/2195 | 1.24E-19 | 1.34E-17 |
| CC | | GO:0031252 | cell leading edge | 88/2195 | 6.54E-19 | 6.06E-17 |
| CC | | GO:0034702 | ion channel complex | 71/2195 | 1.54E-18 | 1.25E-16 |
| CC | | GO:0098978 | glutamatergic synapse | 75/2195 | 1.85E-18 | 1.26E-16 |
| CC | | GO:0099572 | postsynaptic specialization | 79/2195 | 1.94E-18 | 1.26E-16 |
| MF | | GO:0030695 | GTPase regulator activity | 97/2173 | 5.88E-23 | 3.34E-20 |
| MF | | GO:0060589 | nucleoside-triphosphatase regulator activity | 97/2173 | 5.88E-23 | 3.34E-20 |
| MF | | GO:0046873 | metal ion transmembrane transporter activity | 94/2173 | 2.42E-21 | 9.15E-19 |
| MF | | GO:0005216 | ion channel activity | 94/2173 | 4.38E-20 | 1.24E-17 |
| MF | | GO:0005261 | cation channel activity | 78/2173 | 3.13E-19 | 7.10E-17 |
| MF | | GO:0015267 | channel activity | 97/2173 | 1.20E-18 | 1.94E-16 |
| MF | | GO:0022803 | passive transmembrane transporter activity | 97/2173 | 1.20E-18 | 1.94E-16 |
| MF | | GO:0005543 | phospholipid binding | 92/2173 | 1.23E-17 | 1.75E-15 |
| MF | | GO:0022836 | gated channel activity | 73/2173 | 3.54E-17 | 4.46E-15 |
| MF | | GO:0042562 | hormone binding | 34/2173 | 2.98E-16 | 3.37E-14 |
| KEGG | | mmu05205 | Proteoglycans in cancer | 52/1004 | 6.56E-09 | 2.15E-06 |
| KEGG | | mmu05171 | Coronavirus disease - COVID-19 | 58/1004 | 2.20E-08 | 2.25E-06 |
| KEGG | | mmu04072 | Phospholipase D signaling pathway | 41/1004 | 2.26E-08 | 2.25E-06 |
| KEGG | | mmu04925 | Aldosterone synthesis and secretion | 32/1004 | 2.74E-08 | 2.25E-06 |
| KEGG | | mmu04935 | Growth hormone synthesis, secretion and action | 34/1004 | 8.47E-08 | 5.56E-06 |
| KEGG | | mmu04927 | Cortisol synthesis and secretion | 24/1004 | 4.28E-07 | 2.18E-05 |
| KEGG | | mmu04929 | GnRH secretion | 22/1004 | 5.20E-07 | 2.18E-05 |
| KEGG | | mmu04024 | cAMP signaling pathway | 50/1004 | 5.31E-07 | 2.18E-05 |
| KEGG | | mmu04728 | Dopaminergic synapse | 35/1004 | 1.14E-06 | 4.15E-05 |
| KEGG | | mmu04022 | cGMP-PKG signaling pathway | 41/1004 | 1.81E-06 | 5.94E-05 |
| spleen | | | | | | |
| BP | | GO:0035458 | cellular response to interferon-beta | 5/45 | 2.66E-08 | 1.59E-05 |
| BP | | GO:0009615 | response to virus | 8/45 | 4.77E-08 | 1.59E-05 |
| BP | | GO:0035456 | response to interferon-beta | 5/45 | 5.26E-08 | 1.59E-05 |
| BP | | GO:0051607 | defense response to virus | 7/45 | 2.57E-07 | 4.78E-05 |
| BP | | GO:0140546 | defense response to symbiont | 7/45 | 2.64E-07 | 4.78E-05 |
| BP | | GO:0032069 | regulation of nuclease activity | 3/45 | 1.01E-05 | 1.53E-03 |
| BP | | GO:0071346 | cellular response to interferon-gamma | 4/45 | 2.85E-05 | 3.69E-03 |
| BP | | GO:0002832 | negative regulation of response to biotic stimulus | 4/45 | 3.61E-05 | 3.75E-03 |
| BP | | GO:0045088 | regulation of innate immune response | 5/45 | 3.72E-05 | 3.75E-03 |
| BP | | GO:0034341 | response to interferon-gamma | 4/45 | 6.63E-05 | 6.01E-03 |

**Table S2. GO-KEEG enriched items across tissues in X chromosomes**

| ONTOLOGY | ID | Description | Gene  Ratio | p  value | p.  adjust |
| --- | --- | --- | --- | --- | --- |
| adrenal | | | | | |
| CC | GO:0097060 | synaptic membrane | 9/108 | 1.71E-05 | 4.44E-03 |
| CC | GO:0045211 | postsynaptic membrane | 7/108 | 7.96E-05 | 1.03E-02 |
| CC | GO:0014069 | postsynaptic density | 7/108 | 2.56E-04 | 1.90E-02 |
| CC | GO:0032279 | asymmetric synapse | 7/108 | 3.01E-04 | 1.90E-02 |
| CC | GO:0099572 | postsynaptic specialization | 7/108 | 3.77E-04 | 1.90E-02 |
| CC | GO:0098984 | neuron to neuron synapse | 7/108 | 4.38E-04 | 1.90E-02 |
| CC | GO:0098793 | presynapse | 8/108 | 5.58E-04 | 2.07E-02 |
| amygdala | | | | | |
| BP | GO:0045727 | positive regulation of translation | 3/7 | 3.71E-06 | 9.95E-04 |
| BP | GO:0034250 | positive regulation of cellular amide metabolic process | 3/7 | 6.46E-06 | 9.95E-04 |
| BP | GO:0016577 | histone demethylation | 2/7 | 1.91E-05 | 1.28E-03 |
| BP | GO:0070076 | histone lysine demethylation | 2/7 | 1.91E-05 | 1.28E-03 |
| BP | GO:0006482 | protein demethylation | 2/7 | 2.50E-05 | 1.28E-03 |
| BP | GO:0008214 | protein dealkylation | 2/7 | 2.50E-05 | 1.28E-03 |
| BP | GO:0035196 | production of miRNAs involved in gene silencing by miRNA | 2/7 | 5.92E-05 | 2.60E-03 |
| BP | GO:0070918 | primary sncRNA processing | 2/7 | 6.93E-05 | 2.67E-03 |
| BP | GO:0006417 | regulation of translation | 3/7 | 8.59E-05 | 2.94E-03 |
| BP | GO:0070988 | demethylation | 2/7 | 1.11E-04 | 3.42E-03 |
| CC | GO:0000805 | X chromosome | 1/7 | 2.43E-03 | 1.53E-02 |
| CC | GO:0044666 | MLL3/4 complex | 1/7 | 3.16E-03 | 1.53E-02 |
| CC | GO:0005852 | eukaryotic translation initiation factor 3 complex | 1/7 | 3.89E-03 | 1.53E-02 |
| CC | GO:0043186 | P granule | 1/7 | 4.86E-03 | 1.53E-02 |
| CC | GO:0045495 | pole plasm | 1/7 | 4.86E-03 | 1.53E-02 |
| CC | GO:0060293 | germ plasm | 1/7 | 4.86E-03 | 1.53E-02 |
| CC | GO:0061702 | inflammasome complex | 1/7 | 5.35E-03 | 1.53E-02 |
| CC | GO:0000803 | sex chromosome | 1/7 | 9.70E-03 | 2.43E-02 |
| CC | GO:0022627 | cytosolic small ribosomal subunit | 1/7 | 1.12E-02 | 2.48E-02 |
| CC | GO:0010494 | cytoplasmic stress granule | 1/7 | 1.84E-02 | 3.14E-02 |
| MF | GO:0043021 | ribonucleoprotein complex binding | 3/7 | 7.47E-06 | 3.17E-04 |
| MF | GO:0032452 | histone demethylase activity | 2/7 | 1.98E-05 | 3.17E-04 |
| MF | GO:0140457 | protein demethylase activity | 2/7 | 1.98E-05 | 3.17E-04 |
| MF | GO:0032451 | demethylase activity | 2/7 | 4.50E-05 | 5.40E-04 |
| MF | GO:0016706 | 2-oxoglutarate-dependent dioxygenase activity | 2/7 | 8.63E-05 | 8.28E-04 |
| MF | GO:0051213 | dioxygenase activity | 2/7 | 2.18E-04 | 1.74E-03 |
| MF | GO:0016705 | oxidoreductase activity, acting on paired donors, with incorporation or reduction of molecular oxygen | 2/7 | 1.31E-03 | 9.00E-03 |
| MF | GO:0003924 | GTPase activity | 2/7 | 2.19E-03 | 1.19E-02 |
| MF | GO:0008190 | eukaryotic initiation factor 4E binding | 1/7 | 2.47E-03 | 1.19E-02 |
| MF | GO:0070878 | primary miRNA binding | 1/7 | 2.47E-03 | 1.19E-02 |
| hypothalamus | | | | | |
| BP | GO:0045727 | positive regulation of translation | 3/9 | 8.84E-06 | 1.96E-03 |
| BP | GO:0034250 | positive regulation of cellular amide metabolic process | 3/9 | 1.54E-05 | 1.96E-03 |
| BP | GO:0016577 | histone demethylation | 2/9 | 3.26E-05 | 1.96E-03 |
| BP | GO:0070076 | histone lysine demethylation | 2/9 | 3.26E-05 | 1.96E-03 |
| BP | GO:0006482 | protein demethylation | 2/9 | 4.28E-05 | 1.96E-03 |
| BP | GO:0008214 | protein dealkylation | 2/9 | 4.28E-05 | 1.96E-03 |
| BP | GO:0035196 | production of miRNAs involved in gene silencing by miRNA | 2/9 | 1.01E-04 | 3.98E-03 |
| BP | GO:0070918 | primary sncRNA processing | 2/9 | 1.19E-04 | 4.07E-03 |
| BP | GO:0070988 | demethylation | 2/9 | 1.90E-04 | 5.55E-03 |
| BP | GO:0006417 | regulation of translation | 3/9 | 2.02E-04 | 5.55E-03 |
| CC | GO:0000805 | X chromosome | 1/8 | 2.78E-03 | 2.36E-02 |
| CC | GO:0044666 | MLL3/4 complex | 1/8 | 3.61E-03 | 2.36E-02 |
| CC | GO:0005852 | eukaryotic translation initiation factor 3 complex | 1/8 | 4.45E-03 | 2.36E-02 |
| CC | GO:0043186 | P granule | 1/8 | 5.55E-03 | 2.36E-02 |
| CC | GO:0045495 | pole plasm | 1/8 | 5.55E-03 | 2.36E-02 |
| CC | GO:0060293 | germ plasm | 1/8 | 5.55E-03 | 2.36E-02 |
| CC | GO:0061702 | inflammasome complex | 1/8 | 6.11E-03 | 2.36E-02 |
| CC | GO:0000803 | sex chromosome | 1/8 | 1.11E-02 | 3.74E-02 |
| CC | GO:0022627 | cytosolic small ribosomal subunit | 1/8 | 1.27E-02 | 3.82E-02 |
| CC | GO:0010494 | cytoplasmic stress granule | 1/8 | 2.10E-02 | 4.84E-02 |
| MF | GO:0043021 | ribonucleoprotein complex binding | 3/9 | 1.78E-05 | 5.88E-04 |
| MF | GO:0032452 | histone demethylase activity | 2/9 | 3.39E-05 | 5.88E-04 |
| MF | GO:0140457 | protein demethylase activity | 2/9 | 3.39E-05 | 5.88E-04 |
| MF | GO:0032451 | demethylase activity | 2/9 | 7.70E-05 | 1.00E-03 |
| MF | GO:0016706 | 2-oxoglutarate-dependent dioxygenase activity | 2/9 | 1.48E-04 | 1.53E-03 |
| MF | GO:0051213 | dioxygenase activity | 2/9 | 3.71E-04 | 3.22E-03 |
| MF | GO:0016705 | oxidoreductase activity, acting on paired donors, with incorporation or reduction of molecular oxygen | 2/9 | 2.23E-03 | 1.65E-02 |
| MF | GO:0008190 | eukaryotic initiation factor 4E binding | 1/9 | 3.18E-03 | 1.84E-02 |
| MF | GO:0070878 | primary miRNA binding | 1/9 | 3.18E-03 | 1.84E-02 |
| MF | GO:0003924 | GTPase activity | 2/9 | 3.70E-03 | 1.92E-02 |
| kidney | | | | | |
| BP | GO:0010810 | regulation of cell-substrate adhesion | 7/79 | 3.08E-06 | 5.15E-03 |
| BP | GO:0018958 | phenol-containing compound metabolic process | 5/79 | 2.57E-05 | 2.15E-02 |
| BP | GO:0050808 | synapse organization | 8/79 | 6.34E-05 | 3.14E-02 |
| BP | GO:0031589 | cell-substrate adhesion | 7/79 | 7.50E-05 | 3.14E-02 |
| BP | GO:0046390 | ribose phosphate biosynthetic process | 5/79 | 1.13E-04 | 3.77E-02 |
| BP | GO:0006576 | cellular biogenic amine metabolic process | 4/79 | 2.26E-04 | 4.47E-02 |
| BP | GO:0042417 | dopamine metabolic process | 3/79 | 2.77E-04 | 4.47E-02 |
| BP | GO:0006790 | sulfur compound metabolic process | 6/79 | 2.88E-04 | 4.47E-02 |
| BP | GO:0009165 | nucleotide biosynthetic process | 5/79 | 3.18E-04 | 4.47E-02 |
| BP | GO:0044106 | cellular amine metabolic process | 4/79 | 3.49E-04 | 4.47E-02 |
| CC | GO:0005741 | mitochondrial outer membrane | 7/84 | 1.36E-06 | 1.97E-04 |
| CC | GO:0019867 | outer membrane | 7/84 | 2.74E-06 | 1.97E-04 |
| CC | GO:0031968 | organelle outer membrane | 7/84 | 2.74E-06 | 1.97E-04 |
| CC | GO:0005790 | smooth endoplasmic reticulum | 3/84 | 1.47E-04 | 7.96E-03 |
| CC | GO:0022626 | cytosolic ribosome | 4/84 | 3.21E-04 | 1.39E-02 |
| CC | GO:0005840 | ribosome | 5/84 | 6.52E-04 | 2.35E-02 |
| CC | GO:0016323 | basolateral plasma membrane | 5/84 | 7.86E-04 | 2.41E-02 |
| CC | GO:0045121 | membrane raft | 6/84 | 1.04E-03 | 2.41E-02 |
| CC | GO:0098857 | membrane microdomain | 6/84 | 1.06E-03 | 2.41E-02 |
| CC | GO:0031527 | filopodium membrane | 2/84 | 1.12E-03 | 2.41E-02 |
| liver | | | | | |
| BP | GO:0046112 | nucleobase biosynthetic process | 3/56 | 3.83E-06 | 4.64E-03 |
| BP | GO:0009112 | nucleobase metabolic process | 3/56 | 3.64E-05 | 2.21E-02 |
| BP | GO:0045022 | early endosome to late endosome transport | 3/56 | 7.56E-05 | 2.42E-02 |
| BP | GO:0098927 | vesicle-mediated transport between endosomal compartments | 3/56 | 8.70E-05 | 2.42E-02 |
| BP | GO:0042417 | dopamine metabolic process | 3/56 | 9.95E-05 | 2.42E-02 |
| BP | GO:0042135 | neurotransmitter catabolic process | 2/56 | 2.42E-04 | 3.27E-02 |
| BP | GO:0098693 | regulation of synaptic vesicle cycle | 2/56 | 2.42E-04 | 3.27E-02 |
| jjjjj | GO:0006584 | catecholamine metabolic process | 3/56 | 2.42E-04 | 3.27E-02 |
| BP | GO:0009712 | catechol-containing compound metabolic process | 3/56 | 2.42E-04 | 3.27E-02 |
| BP | GO:0033240 | positive regulation of cellular amine metabolic process | 2/56 | 2.85E-04 | 3.47E-02 |
| BP | GO:1904064 | positive regulation of cation transmembrane transport | 4/56 | 3.38E-04 | 3.73E-02 |
| BP | GO:0001885 | endothelial cell development | 3/56 | 4.09E-04 | 4.14E-02 |
| BP | GO:0034767 | positive regulation of ion transmembrane transport | 4/56 | 5.46E-04 | 4.68E-02 |
| BP | GO:2000641 | regulation of early endosome to late endosome transport | 2/56 | 5.56E-04 | 4.68E-02 |
| BP | GO:0019722 | calcium-mediated signaling | 4/56 | 5.78E-04 | 4.68E-02 |
| BP | GO:0045198 | establishment of epithelial cell apical/basal polarity | 2/56 | 6.21E-04 | 4.71E-02 |
| BP | GO:0006144 | purine nucleobase metabolic process | 2/56 | 6.89E-04 | 4.92E-02 |
| CC | GO:0031527 | filopodium membrane | 2/58 | 5.34E-04 | 3.43E-02 |
| CC | GO:0005741 | mitochondrial outer membrane | 4/58 | 5.71E-04 | 3.43E-02 |
| CC | GO:0019867 | outer membrane | 4/58 | 8.48E-04 | 3.43E-02 |
| CC | GO:0031968 | organelle outer membrane | 4/58 | 8.48E-04 | 3.43E-02 |
| MF | GO:0003779 | actin binding | 7/55 | 2.38E-05 | 4.28E-03 |
| MF | GO:0016641 | oxidoreductase activity, acting on the CH-NH2 group of donors, oxygen as acceptor | 2/55 | 7.62E-04 | 3.59E-02 |
| MF | GO:0000287 | magnesium ion binding | 4/55 | 7.63E-04 | 3.59E-02 |
| MF | GO:0051015 | actin filament binding | 4/55 | 8.62E-04 | 3.59E-02 |
| MF | GO:0016638 | oxidoreductase activity, acting on the CH-NH2 group of donors | 2/55 | 9.98E-04 | 3.59E-02 |
| KEGG | mmu00260 | Glycine, serine and threonine metabolism | 3/33 | 4.05E-04 | 4.98E-02 |
| pituitary | | | | | |
| BP | GO:0050807 | regulation of synapse organization | 8/100 | 3.91E-06 | 4.36E-03 |
| BP | GO:0050803 | regulation of synapse structure or activity | 8/100 | 4.87E-06 | 4.36E-03 |
| BP | GO:0099174 | regulation of presynapse organization | 4/100 | 1.38E-05 | 8.24E-03 |
| BP | GO:0099054 | presynapse assembly | 4/100 | 3.78E-05 | 1.31E-02 |
| BP | GO:0048813 | dendrite morphogenesis | 6/100 | 4.96E-05 | 1.31E-02 |
| BP | GO:0009914 | hormone transport | 8/100 | 5.50E-05 | 1.31E-02 |
| BP | GO:0050808 | synapse organization | 9/100 | 5.69E-05 | 1.31E-02 |
| BP | GO:0099172 | presynapse organization | 4/100 | 6.12E-05 | 1.31E-02 |
| BP | GO:0051963 | regulation of synapse assembly | 5/100 | 6.58E-05 | 1.31E-02 |
| BP | GO:1901888 | regulation of cell junction assembly | 6/100 | 1.21E-04 | 1.98E-02 |
| CC | GO:0022626 | cytosolic ribosome | 7/102 | 1.45E-07 | 3.40E-05 |
| CC | GO:0044391 | ribosomal subunit | 7/102 | 6.37E-06 | 7.49E-04 |
| CC | GO:0022627 | cytosolic small ribosomal subunit | 4/102 | 2.18E-05 | 1.29E-03 |
| CC | GO:0005840 | ribosome | 7/102 | 2.19E-05 | 1.29E-03 |
| CC | GO:0022625 | cytosolic large ribosomal subunit | 4/102 | 7.58E-05 | 3.56E-03 |
| CC | GO:0015935 | small ribosomal subunit | 4/102 | 1.74E-04 | 6.83E-03 |
| CC | GO:0045177 | apical part of cell | 8/102 | 3.50E-04 | 1.18E-02 |
| CC | GO:0097060 | synaptic membrane | 7/102 | 4.91E-04 | 1.44E-02 |
| CC | GO:0031252 | cell leading edge | 7/102 | 6.79E-04 | 1.77E-02 |
| CC | GO:0030139 | endocytic vesicle | 5/102 | 9.52E-04 | 2.04E-02 |
| MF | GO:0042043 | neurexin family protein binding | 3/103 | 2.07E-05 | 2.22E-03 |
| MF | GO:0005237 | inhibitory extracellular ligand-gated ion channel activity | 3/103 | 3.08E-05 | 2.22E-03 |
| MF | GO:0003735 | structural constituent of ribosome | 6/103 | 3.12E-05 | 2.22E-03 |
| MF | GO:1904315 | transmitter-gated ion channel activity involved in regulation of postsynaptic membrane potential | 4/103 | 3.93E-05 | 2.22E-03 |
| MF | GO:0099529 | neurotransmitter receptor activity involved in regulation of postsynaptic membrane potential | 4/103 | 4.91E-05 | 2.22E-03 |
| MF | GO:0022824 | transmitter-gated ion channel activity | 4/103 | 5.65E-05 | 2.22E-03 |
| MF | GO:0022835 | transmitter-gated channel activity | 4/103 | 5.65E-05 | 2.22E-03 |
| MF | GO:0099095 | ligand-gated anion channel activity | 3/103 | 5.95E-05 | 2.22E-03 |
| MF | GO:0005230 | extracellular ligand-gated ion channel activity | 4/103 | 1.20E-04 | 3.58E-03 |
| MF | GO:0098960 | postsynaptic neurotransmitter receptor activity | 4/103 | 1.20E-04 | 3.58E-03 |
| KEGG | mmu05171 | Coronavirus disease - COVID-19 | 8/53 | 9.00E-05 | 1.21E-02 |
| KEGG | mmu03010 | Ribosome | 6/53 | 6.02E-04 | 4.03E-02 |
| spleen | | | | | |
| BP | GO:0016577 | histone demethylation | 2/8 | 2.54E-05 | 2.27E-03 |
| BP | GO:0070076 | histone lysine demethylation | 2/8 | 2.54E-05 | 2.27E-03 |
| BP | GO:0006482 | protein demethylation | 2/8 | 3.33E-05 | 2.27E-03 |
| BP | GO:0008214 | protein dealkylation | 2/8 | 3.33E-05 | 2.27E-03 |
| BP | GO:0070988 | demethylation | 2/8 | 1.48E-04 | 8.04E-03 |
| BP | GO:0016331 | morphogenesis of embryonic epithelium | 2/8 | 1.12E-03 | 3.38E-02 |
| BP | GO:0035264 | multicellular organism growth | 2/8 | 1.62E-03 | 3.38E-02 |
| BP | GO:0006338 | chromatin remodeling | 2/8 | 1.71E-03 | 3.38E-02 |
| BP | GO:0006450 | regulation of translational fidelity | 1/8 | 2.77E-03 | 3.38E-02 |
| BP | GO:0060513 | prostatic bud formation | 1/8 | 2.77E-03 | 3.38E-02 |
| CC | GO:0000805 | X chromosome | 1/8 | 2.78E-03 | 1.45E-02 |
| CC | GO:0044666 | MLL3/4 complex | 1/8 | 3.61E-03 | 1.45E-02 |
| CC | GO:0000803 | sex chromosome | 1/8 | 1.11E-02 | 2.96E-02 |
| CC | GO:0035097 | histone methyltransferase complex | 1/8 | 2.10E-02 | 4.19E-02 |
| CC | GO:0034708 | methyltransferase complex | 1/8 | 2.91E-02 | 4.66E-02 |
| MF | GO:0032452 | histone demethylase activity | 2/8 | 2.64E-05 | 5.41E-04 |
| MF | GO:0140457 | protein demethylase activity | 2/8 | 2.64E-05 | 5.41E-04 |
| MF | GO:0032451 | demethylase activity | 2/8 | 6.00E-05 | 8.20E-04 |
| MF | GO:0016706 | 2-oxoglutarate-dependent dioxygenase activity | 2/8 | 1.15E-04 | 1.18E-03 |
| MF | GO:0051213 | dioxygenase activity | 2/8 | 2.90E-04 | 2.37E-03 |
| MF | GO:0016705 | oxidoreductase activity, acting on paired donors, with incorporation or reduction of molecular oxygen | 2/8 | 1.74E-03 | 1.19E-02 |
| MF | GO:0061629 | RNA polymerase II-specific DNA-binding transcription factor binding | 2/8 | 4.71E-03 | 2.76E-02 |
| MF | GO:0001091 | RNA polymerase II general transcription initiation factor binding | 1/8 | 7.05E-03 | 3.61E-02 |
| MF | GO:0050681 | nuclear androgen receptor binding | 1/8 | 9.30E-03 | 3.97E-02 |
| MF | GO:0001223 | transcription coactivator binding | 1/8 | 1.35E-02 | 3.97E-02 |

**Table S3:** DEGs in mice liver

| *C530036F05Rik* | *C1qtnf4* | *ADRA2A* | *MPC1* | *Cux2* | *FAM126A* | *Gstt3* |
| --- | --- | --- | --- | --- | --- | --- |
| *1700010L04Rik* | *Ttll10* | *Agpat1* | *Spata3* | *Cyp2b10* | *Dri2* | *Hao3* |
| *1700020N01Rik* | *Defb29* | *Prlr* | *Casp14* | *Cyp2b10* | *Kdm2b* | *Hsd3b5* |
| *1700030J22Rik* | *Lcn12* | *Akr1b7* | *CBR* | *Cyp2b13* | *Susd4* | *KAT5* |
| *4930430O22Rik* | *Pate5* | *Arsa* | *Ccnd1* | *Cyp2b9* | *CIG30* | *IGFBPRP4* |
| *A030013N09* | *Stpg4* | *ACER1* | *CD248* | *Cyp4a12a* | *F2r* | *ITGA1* |
| *LOC380691* | *CIP3* | *Atp6v0d2* | *Cd28* | *Cyp7b1* | *Fgf6* | *TASK2* |
| *A230106D06* | *MINDY3* | *PRRC2A* | *Cml5* | *Sfmbt2* | *Fmo3* | *Lama3* |
| *LOC546224* | *Abcd2* | *Camkv* | *Rdh16f2* | *Tmem98* | *Frs3* | *RXFP2* |
| *TTC39C* | *Abcd2* | *Ccdc106* | *CREG1* | *DHRS7A* | *Gng4* | *Ly6c* |
| *NIPAL1* | *ABCG2* | *Kics2* | *CPSB* | *DMT* | *Gstp2* | *Ly6f* |
| *Mc1r* | *Olfr283* | *PLEK2* | *Strn* | *Olfr1109* | *Sort1* | *AGM1* |
| *MCP2* | *Olfr427* | *PRLR* | *Strn4* | *Olfr125* | *SOX12* | *Zfp536* |
| *MIG11* | *Olfr434* | *MSTP061* | *Sult3a1* | *Olfr1286* | *AMSHLP* |  |
| *GPR167* | *Olfr460* | *NOGO* | *APELA* | *Olfr1339* | *Sult2a2* |  |
| *Nfat5* | *Olfr47* | *Slc29a4* | *Timm17a* | *Olfr807* | *Ust3m* |  |
| *Ocilrp1* | *Olfr608* | *Slc35e3* | *DCSTAMP* | *Olfr914* | *Vmn1r237* |  |
| *OPPO1* | *Olfr67* | *Slco1a1* | *Trim24* | *SLRR2C* | *Vamp2* |  |

**Table S4: SNPs in the significant LRS (>17.39) location of Akr1d1 in female adrenal.**

| Source: WebQTL, The GeneNetwork (http://www.genenetwork.org) | | | | | | | |
| --- | --- | --- | --- | --- | --- | --- | --- |
| Trait ID: INIA Adrenal Affy MoGene 1.0ST (Jun12) RMA Females : 10537306 | | | | | | | |
| Suggestive LRS = 11.02 Significant LRS = 17.39 | | | | | | | |
| Index | Locus | cM | Mb | LRS | P-value | Additive | Genes |
| 1 | rs33106158 | 16.46 | 33.146 | 17.586 | 0.048 | 0.184 | None |
| 2 | rs33413528 | 16.59 | 33.506 | 17.586 | 0.048 | 0.184 | None |
| 3 | UNC27813303 | 16.59 | 34.843 | 17.586 | 0.048 | 0.184 | None |
| 4 | UNCHS044198 | 17.11 | 35.021 | 17.586 | 0.048 | 0.184 | None |
| 5 | UNC27815879 | 17.11 | 35.194 | 17.586 | 0.048 | 0.184 | None |
| 6 | rs13482963 | 17.23 | 35.53 | 17.586 | 0.048 | 0.184 | *Cchcr1* |
| 7 | JAX00437337 | 17.23 | 35.578 | 17.586 | 0.048 | 0.184 | None |
| 8 | UNCHS044220 | 17.49 | 35.964 | 17.586 | 0.048 | 0.184 | None |
| 9 | rs33441410 | 17.49 | 39.789 | 17.586 | 0.048 | 0.184 | None |

**Table S5: Genes in the significant LRS region of Akr1d1 in female adrenal.**

| <http://www.genenetwork.org/webqtl/main.py?FormID=intervalAnalyst> | | | | |
| --- | --- | --- | --- | --- |
| view region : Chr 17 33.146000 - 39.789000 Mb | | | | |
| Index | **Gene** | **Description (mm10)** | **Start (mm10)** | **End (mm10)** |
| 1 | *Olfr55* | olfactory receptor 55 | 33.176415 | 33.177363 |
| 2 | *Olfr239* | olfactory receptor 239 (Olfr239), mRNA. | 33.199061 | 33.200009 |
| 3 | *Gm4461* | predicted gene 4461 (Gm4461), mRNA. | 33.21526 | 33.216351 |
| 4 | *Zfp955a* | zinc finger protein 955A (Zfp955a), mRNA. | 33.239506 | 33.255145 |
| 5 | *Olfr63* | olfactory receptor 63 | 33.268725 | 33.269676 |
| 6 | *Zfp955b* | zinc finger protein 955B (Zfp955b), mRNA. | 33.289543 | 33.304689 |
| 7 | *Zfp81* | zinc finger protein 81 | 33.333727 | 33.358878 |
| 8 | *Zfp101* | zinc finger protein 101 | 33.380178 | 33.394637 |
| 9 | *1700029I08Rik* | RIKEN cDNA 1700029I08 gene | 33.432898 | 33.434265 |
| 10 | *Actl9* | actin-like 9 (Actl9), mRNA. | 33.432898 | 33.434267 |
| 11 | *Adamts10* | a disintegrin-like and metallopeptidase (reprolysin type) with thrombospondin type 1 motif, 10 | 33.524195 | 33.553782 |
| 12 | *Myo1f* | myosin IF | 33.555706 | 33.607764 |
| 13 | *Zfp414* | zinc finger protein 414 | 33.629091 | 33.631714 |
| 14 | *Pram1* | PML-RAR alpha-regulated adaptor molecule 1 | 33.630758 | 33.645706 |
| 15 | *Hnrpm* | heterogeneous nuclear ribonucleoprotein M | 33.646232 | 33.685458 |
| 16 | *Hnrnpm* | heterogeneous nuclear ribonucleoprotein M (Hnrnpm), transcript variant 2, mRNA. | 33.646232 | 33.685458 |
| 17 | *1700001C07Rik* | RIKEN cDNA 1700001C07 gene | 33.685544 | 33.685786 |
| 18 | *March2* | membrane-associated ring finger (C3HC4) 2 | 33.685691 | 33.718677 |
| 19 | *AK036614* | adult male bone cDNA, RIKEN full-length enriched library, clone:9830141J12 product:similar to HSPC240 [Homo sapiens], full insert sequence. | 33.694216 | 33.696246 |
| 20 | *Rab11b* | RAB11B, member RAS oncogene family | 33.742483 | 33.760486 |
| 21 | *AK133808* | 8 days embryo whole body cDNA, RIKEN full-length enriched library, clone:5730424I07 product:unclassifiable, full insert sequence. | 33.759991 | 33.76187 |
| 22 | *Angptl4* | angiopoietin-like 4 | 33.774899 | 33.781575 |
| 23 | *4931413I07Rik* | RIKEN cDNA 4931413I07 gene | 33.783339 | 33.785724 |
| 24 | *Kank3* | KN motif and ankyrin repeat domains 3 | 33.810522 | 33.818444 |
| 25 | *Rps28* | ribosomal protein S28 | 33.823036 | 33.824498 |
| 26 | *Ndufa7* | NADH dehydrogenase (ubiquinone) 1 alpha subcomplex, 7 (B14.5a) | 33.824571 | 33.838316 |
| 27 | *Cd320* | CD320 antigen | 33.843425 | 33.849774 |
| 28 | *Kifc1* | kinesin family member C5B | 33.875665 | 33.890633 |
| 29 | *AB348327* | non-coding RNA, oocyte_clustered_small_RNA13528, complete sequence. | 33.875782 | 33.875804 |
| 30 | *AB344706* | non-coding RNA, oocyte_clustered_small_RNA9907, complete sequence. | 33.875827 | 33.875851 |
| 31 | *AB348315* | non-coding RNA, oocyte_clustered_small_RNA13516, complete sequence. | 33.881429 | 33.88145 |
| 32 | *AB344666* | non-coding RNA, oocyte_clustered_small_RNA9867, complete sequence. | 33.883717 | 33.88374 |
| 33 | *Platr17* | pluripotency associated transcript 17 (Platr17), long non-coding RNA. | 33.905134 | 33.906675 |
| 34 | *BC051226* | cDNA sequence BC051226 | 33.908181 | 33.909178 |
| 35 | *Daxx* | Fas death domain-associated protein | 33.9096 | 33.91559 |
| 36 | *Zbtb22* | zinc finger and BTB domain containing 22 | 33.916175 | 33.919325 |
| 37 | *AK140218* | adult male corpora quadrigemina cDNA, RIKEN full-length enriched library, clone:B230348K03 product:unclassifiable, full insert sequence. | 33.919294 | 33.920485 |
| 38 | *Tapbp* | TAP binding protein | 33.919477 | 33.92929 |
| 39 | *Rgl2* | ral guanine nucleotide dissociation stimulator-like 2 | 33.929893 | 33.937687 |
| 40 | *H2-Ke2* | H2-K region expressed gene 2 | 33.938908 | 33.940343 |
| 41 | *Pfdn6* | prefoldin subunit 6 (Pfdn6), transcript variant 2, mRNA. | 33.938908 | 33.94033 |
| 42 | *Wdr46* | WD repeat domain 46 | 33.940722 | 33.949695 |
| 43 | *B3galt4* | UDP-Gal:betaGlcNAc beta 1,3-galactosyltransferase, polypeptide 4 | 33.949911 | 33.951488 |
| 44 | *Rps18* | ribosomal protein S18 | 33.951998 | 33.953994 |
| 45 | *Vps52* | VPS52 GARP complex subunit | 33.955881 | 33.966488 |
| 46 | *AK190492* | cDNA, clone: Y1G0102O15, strand:plus, reference: ENSEMBL: Mouse-Transcript-ENST: ENSMUST00000025178, based on BLAT search. | 33.966349 | 33.96649 |
| 47 | *H2-K2* | histocompatibility 2, K region locus 2 (H2-K2), non-coding RNA. | 33.974658 | 33.978791 |
| 48 | *AA388235* | expressed sequence AA388235 | 33.981491 | 33.985358 |
| 49 | *H2-K1* | histocompatibility 2, K1, K region | 33.996011 | 34.000333 |
| 50 | *Ring1* | ring finger protein 1 | 34.020791 | 34.02468 |
| 51 | *Mir219a-1* | microRNA 219a-1 (Mir219a-1), microRNA. | 34.024982 | 34.025092 |
| 52 | *Mir219c* | microRNA 219c (Mir219c), microRNA. | 34.025011 | 34.025071 |
| 53 | *H2-Ke6* | H2-K region expressed gene 6 | 34.026032 | 34.028055 |
| 54 | *Slc39a7* | solute carrier family 39 (zinc transporter), member 7 | 34.027202 | 34.03169 |
| 55 | *AK210432* | cDNA, clone: Y2G0118G11, strand:minus, reference:ENSEMBL: Mouse-Transcript-ENST: ENSMUST00000025186, based on BLAT search. | 34.028505 | 34.028919 |
| 56 | *Rxrb* | retinoid X receptor beta | 34.031811 | 34.038403 |
| 57 | *Col11a2* | collagen, type XI, alpha 2 | 34.039137 | 34.052517 |
| 58 | *BC051537* | cDNA sequence BC051537 | 34.083842 | 34.095309 |
| 59 | *H2-Oa* | histocompatibility 2, O region alpha locus | 34.092378 | 34.095234 |
| 60 | *Brd2* | bromodomain containing 2 | 34.112018 | 34.122607 |
| 61 | *H2-DMa* | histocompatibility 2, class II, locus DMa | 34.122831 | 34.139101 |
| 62 | *H2-DMb2* | histocompatibility 2, class II, locus Mb2 | 34.145415 | 34.151095 |
| 63 | *H2-DMb1* | histocompatibility 2, class II, locus Mb1 | 34.145415 | 34.160229 |
| 64 | *Psmb9* | proteasome (prosome, macropain) subunit, beta type 9 (large multifunctional peptidase 2) | 34.182098 | 34.18733 |
| 65 | *Tap1* | transporter 1, ATP-binding cassette, sub-family B (MDR/TAP) | 34.187555 | 34.197225 |
| 66 | *Psmb8* | proteasome (prosome, macropain) subunit, beta type 8 (large multifunctional peptidase 7) | 34.198194 | 34.201454 |
| 67 | *Tap2* | transporter 2, ATP-binding cassette, sub-family B (MDR/TAP) | 34.204478 | 34.216321 |
| 68 | *H2-Ob* | histocompatibility 2, O region beta locus | 34.238904 | 34.245798 |
| 69 | *H2-Ab1* | histocompatibility 2, class II antigen A, beta 1 | 34.263226 | 34.269418 |
| 70 | *H2-Aa* | histocompatibility 2, class II antigen A, alpha | 34.28275 | 34.287771 |
| 71 | *AK171153* | NOD-derived CD11c +ve dendritic cells cDNA, RIKEN full-length enriched library, clone: F630228D23 product: Class II major histocompatibility complex alpha chain (Fragment) homolog [Mus sp], full insert sequence. | 34.284905 | 34.285687 |
| 72 | *H2-Eb1* | histocompatibility 2, class II antigen E beta | 34.305866 | 34.316674 |
| 73 | *H2-Eb2* | histocompatibility 2, class II antigen E beta2 | 34.325674 | 34.34141 |
| 74 | *H2-Ea* | histocompatibility 2, class II antigen E alpha | 34.342211 | 34.344645 |
| 75 | *H2-Ea-ps* | histocompatibility 2, class II antigen E alpha, pseudogene (H2-Ea-ps), mRNA. | 34.342211 | 34.344645 |
| 76 | *Btnl2* | butyrophilin-like 2 | 34.354821 | 34.369492 |
| 77 | *Btnl1* | butyrophilin-like 1 | 34.377131 | 34.386028 |
| 78 | *BC051142* | cDNA sequence BC051142 | 34.398819 | 34.460734 |
| 79 | *Btnl4* | butyrophilin-like 4 | 34.469041 | 34.475937 |
| 80 | *Btnl5-ps* | butyrophilin-like 5, pseudogene (Btnl5-ps), non-coding RNA. | 34.487405 | 34.497429 |
| 81 | *Btnl6* | butyrophilin-like 6 | 34.507934 | 34.517352 |
| 82 | *Btnl7* | butyrophilin-like 7 | 34.532876 | 34.54764 |
| 83 | *Notch4* | notch 4 | 34.564294 | 34.588543 |
| 84 | *Gpsm3* | G-protein signalling modulator 3 (AGS3-like, C. elegans) | 34.589805 | 34.591754 |
| 85 | *Pbx2* | pre B cell leukemia homeobox 2 | 34.59247 | 34.597341 |
| 86 | *Ager* | advanced glycosylation end product-specific receptor | 34.597849 | 34.600937 |
| 87 | *Rnf5* | ring finger protein 5 | 34.601098 | 34.603561 |
| 88 | *Agpat1* | 1-acylglycerol-3-phosphate O-acyltransferase 1 (lysophosphatidic acid acyltransferase, alpha) | 34.60586 | 34.613449 |
| 89 | *Egfl8* | EGF-like domain 8 | 34.613349 | 34.615971 |
| 90 | *Ppt2* | palmitoyl-protein thioesterase 2 | 34.616661 | 34.628279 |
| 91 | *2610029K11Rik* | RIKEN cDNA 2610029K11 gene | 34.627825 | 34.628754 |
| 92 | *Prrt1* | proline-rich transmembrane protein 1 | 34.629685 | 34.63226 |
| 93 | *Fkbpl* | FK506 binding protein-like | 34.644882 | 34.646327 |
| 94 | *Atf6b* | activating transcription factor 6 beta (Atf6b), mRNA. | 34.647145 | 34.655074 |
| 95 | *Crebl1* | cAMP responsive element binding protein-like 1 | 34.647179 | 34.655072 |
| 96 | *Tnxb* | tenascin XB | 34.670534 | 34.719815 |
| 97 | *C4b* | complement component 4B (Chido blood group) | 34.72838 | 34.743897 |
| 98 | *C4a* | complement component 4A (Rodgers blood group) | 34.72838 | 34.814438 |
| 99 | *Cyp21a1* | cytochrome P450, family 21, subfamily a, polypeptide 1 | 34.801347 | 34.804426 |
| 100 | *Stk19* | serine/threonine kinase 19 | 34.823992 | 34.836903 |
| 101 | *Dxo* | decapping exoribonuclease (Dxo), transcript variant 2, mRNA. | 34.837018 | 34.839186 |
| 102 | *Dom3z* | DOM-3 homolog Z (C. elegans) | 34.837082 | 34.839233 |
| 103 | *Skiv2l* | superkiller viralicidic activity 2-like (S. cerevisiae) | 34.839225 | 34.850204 |
| 104 | *Mir6971* | microRNA 6971 (Mir6971), microRNA. | 34.841808 | 34.841871 |
| 105 | *Mir6970* | microRNA 6970 (Mir6970), microRNA. | 34.8451 | 34.845167 |
| 106 | *Rdbp* | RD RNA-binding protein | 34.85039 | 34.856372 |
| 107 | *Nelfe* | negative elongation factor complex member E, Rdbp (Nelfe), transcript variant 2, mRNA. | 34.85039 | 34.856372 |
| 108 | *Cfb* | complement factor B | 34.856373 | 34.862514 |
| 109 | *Mir6972* | microRNA 6972 (Mir6972), microRNA. | 34.857568 | 34.857632 |
| 110 | *C2* | complement component 2 (within H-2S) | 34.862601 | 34.8821 |
| 111 | *Zbtb12* | zinc finger and BTB domain containing 12 | 34.894558 | 34.896844 |
| 112 | *Ehmt2* | euchromatic histone lysine N-methyltransferase 2 | 34.898973 | 34.91405 |
| 113 | *AK211100* | cDNA, clone: Y2G0120K12, strand:minus, reference: ENSEMBL: Mouse-Transcript-ENST: ENSMUST00000043876, based on BLAT search. | 34.913839 | 34.914051 |
| 114 | *Slc44a4* | solute carrier family 44, member 4 | 34.914465 | 34.930436 |
| 115 | *Neu1* | neuraminidase 1 | 34.931252 | 34.937297 |
| 116 | *1110038B12Rik* | RIKEN cDNA 1110038B12 gene | 34.950235 | 34.952471 |
| 117 | *Snord52* | small nucleolar RNA, C/D box 52 (Snord52), small nucleolar RNA. | 34.950949 | 34.951008 |
| 118 | *AF357376* | clone MBII-308 C/D box snoRNA, partial sequence. | 34.952236 | 34.952294 |
| 119 | *Hspa1b* | heat shock protein 1B | 34.956428 | 34.959238 |
| 120 | *Hspa1a* | heat shock protein 1A | 34.969358 | 34.972156 |
| 121 | *Hspa1l* | heat shock protein 1-like | 34.972702 | 34.979228 |
| 122 | *AK134546* | adult male medulla oblongata cDNA, RIKEN full-length enriched library, clone:6330407P18 product:unclassifiable, full insert sequence. | 34.979436 | 34.982099 |
| 123 | *Lsm2* | LSM2 homolog, U6 small nuclear RNA and mRNA degradation associated | 34.981853 | 34.985893 |
| 124 | *D17H6S56E-5* | DNA segment, Chr 17, human D6S56E 5 | 34.996723 | 35.000746 |
| 125 | *Vars* | valyl-tRNA synthetase | 35.000906 | 35.01603 |
| 126 | *D17H6S56E-3* | DNA segment, Chr 17, human D6S56E 3 | 35.016578 | 35.026741 |
| 127 | *Vwa7* | von Willebrand factor A domain containing 7 (Vwa7), mRNA. | 35.016578 | 35.026741 |
| 128 | *Sapcd1* | suppressor APC domain containing 1 (Sapcd1), transcript variant 1, mRNA. | 35.025972 | 35.028016 |
| 129 | *Ng23* | Ng23 protein | 35.025976 | 35.027916 |
| 130 | *Msh5* | mutS homolog 5 | 35.028604 | 35.046745 |
| 131 | *Clic1* | chloride intracellular channel 1 | 35.050242 | 35.058719 |
| 132 | *Ddah2* | dimethylarginine dimethylaminohydrolase 2 | 35.059034 | 35.062099 |
| 133 | *AU023871* | expressed sequence AU023871 | 35.062692 | 35.066184 |
| 134 | *G6b* | G6b opposite strand | 35.062692 | 35.066184 |
| 135 | *G6bos* | G6b opposite strand (G6bos), long non-coding RNA. | 35.064436 | 35.065596 |
| 136 | *Ly6g6c* | lymphocyte antigen 6 complex, locus G6C | 35.067324 | 35.069534 |
| 137 | *Ly6g6d* | lymphocyte antigen 6 complex, locus G6D | 35.071347 | 35.074464 |
| 138 | *Ly6g6e* | lymphocyte antigen 6 complex, locus G6E | 35.076941 | 35.078285 |
| 139 | *Ly6g6f* | lymphocyte antigen 6 complex, locus G6F (Ly6g6f), mRNA. | 35.080537 | 35.085595 |
| 140 | *Bat5* | HLA-B associated transcript 5 | 35.08929 | 35.102987 |
| 141 | *Abhd16a* | abhydrolase domain containing 16A (Abhd16a), mRNA. | 35.08929 | 35.102987 |
| 142 | *Ly6g5c* | lymphocyte antigen 6 complex, locus G5C | 35.108299 | 35.111953 |
| 143 | *Ly6g5b* | lymphocyte antigen 6 complex, locus G5B | 35.113945 | 35.120527 |
| 144 | *Csnk2b* | casein kinase 2, beta polypeptide | 35.116194 | 35.121429 |
| 145 | *Gpank1* | G patch domain and ankyrin repeats 1 (Gpank1), transcript variant 2, mRNA. | 35.121495 | 35.124815 |
| 146 | *D17H6S53E* | DNA segment, Chr 17, human D6S53E | 35.126401 | 35.128855 |
| 147 | *Apom* | apolipoprotein M | 35.128996 | 35.131752 |
| 148 | *Bag6* | BCL2-associated athanogene 6 (Bag6), transcript variant 2, mRNA. | 35.135177 | 35.147322 |
| 149 | *Bat3* | HLA-B-associated transcript 3 | 35.135241 | 35.147236 |
| 150 | *Bat2* | HLA-B associated transcript 2 | 35.149085 | 35.163048 |
| 151 | *Prrc2a* | proline-rich coiled-coil 2A (Prrc2a), transcript variant 2, mRNA. | 35.149085 | 35.164877 |
| 152 | *Aif1* | allograft inflammatory factor 1 | 35.170991 | 35.17271 |
| 153 | *Lst1* | leukocyte specific transcript 1 | 35.185094 | 35.18844 |
| 154 | *Ltb* | lymphotoxin B | 35.194506 | 35.196305 |
| 155 | *Mir6973a* | microRNA 6973a (Mir6973a), microRNA. | 35.194971 | 35.195049 |
| 156 | *Tnf* | tumor necrosis factor | 35.199366 | 35.202007 |
| 157 | *Lta* | lymphotoxin A | 35.203164 | 35.205351 |
| 158 | *Mir6974* | microRNA 6974 (Mir6974), microRNA. | 35.204474 | 35.204557 |
| 159 | *Nfkbil1* | nuclear factor of kappa light polypeptide gene enhancer in B cells inhibitor like 1 | 35.220174 | 35.235815 |
| 160 | *AK080258* | adult male aorta and vein cDNA, RIKEN full-length enriched library, clone:A530093O14 product:unclassifiable, full insert sequence. | 35.220833 | 35.224132 |
| 161 | *Atp6v1g2* | ATPase, H+ transporting, lysosomal V1 subunit G2 | 35.236595 | 35.238768 |
| 162 | *LOC545198* | hypothetical LOC545198 | 35.240166 | 35.242284 |
| 163 | *0610037M15Rik* | RIKEN cDNA 0610037M15 gene | 35.241799 | 35.430047 |
| 164 | *Bat1a* | HLA-B-associated transcript 1A | 35.241869 | 35.253682 |
| 165 | *Ddx39b* | DEAD (Asp-Glu-Ala-Asp) box polypeptide 39B (Ddx39b), transcript variant 2, mRNA. | 35.242816 | 35.253707 |
| 166 | *Mir6975* | microRNA 6975 (Mir6975), microRNA. | 35.244074 | 35.244135 |
| 167 | *Mir8094* | microRNA 8094 (Mir8094), microRNA. | 35.251288 | 35.251405 |
| 168 | *5430410E06Rik* | RIKEN cDNA 5430410E06 gene | 35.262268 | 35.263604 |
| 169 | *H2-D1* | histocompatibility 2, D region locus 1 | 35.263093 | 35.266726 |
| 170 | *LOC547349* | similar to MHC class I antigen precursor | 35.265778 | 35.325409 |
| 171 | *H2-L* | histocompatibility 2, D region locus L | 35.265783 | 35.323601 |
| 172 | *H2-Q1* | histocompatibility 2, Q region locus 1 | 35.320557 | 35.325099 |
| 173 | *H2-Q2* | histocompatibility 2, Q region locus 2 | 35.342332 | 35.345722 |
| 174 | *2310014H01Rik* | RIKEN cDNA 2310014H01 gene | 35.346618 | 35.346668 |
| 175 | *H2-gs10* | MHC class I like protein GS10 | 35.379616 | 35.384674 |
| 176 | *H2-Q4* | histocompatibility 2, Q region locus 4 (H2-Q4), mRNA. | 35.379616 | 35.384674 |
| 177 | *H2-Q5* | histocompatibility 2, Q region locus 5 | 35.394098 | 35.39563 |
| 178 | *X57330* | mRNA for Qa-2 antigen. | 35.397329 | 35.3978 |
| 179 | *H2-Q8* | histocompatibility 2, Q region locus 8 | 35.424846 | 35.428382 |
| 180 | *H2-Q6* | histocompatibility 2, Q region locus 6 | 35.425107 | 35.430053 |
| 181 | *H2-Q7* | histocompatibility 2, Q region locus 7 | 35.439154 | 35.443773 |
| 182 | *H2-Q9* | histocompatibility 2, Q region locus 9 | 35.439206 | 35.443769 |
| 183 | *H2-Q10* | histocompatibility 2, Q region locus 10 | 35.470088 | 35.474563 |
| 184 | *Pou5f1* | POU domain, class 5, transcription factor 1 | 35.508806 | 35.510777 |
| 185 | *Tcf19* | transcription factor 19 | 35.512734 | 35.516824 |
| 186 | *Cchcr1* | coiled-coil alpha-helical rod protein 1 | 35.517115 | 35.531015 |
| 187 | *Psors1c2* | psoriasis susceptibility 1 candidate 2 (human) | 35.5332 | 35.534648 |
| 188 | *Cdsn* | corneodesmosin | 35.552127 | 35.55718 |
| 189 | *2300002M23Rik* | RIKEN cDNA 2300002M23 gene | 35.567484 | 35.568945 |
| 190 | *Muc21* | mucin 21 | 35.617922 | 35.619299 |
| 191 | *Gm9573* | predicted gene 9573 (Gm9573), mRNA. | 35.617922 | 35.626637 |
| 192 | *Dpcr1* | diffuse panbronchiolitis critical region 1 (human) | 35.635754 | 35.643695 |
| 193 | *EG433102* | predicted gene, EG433102 | 35.649707 | 35.650569 |
| 194 | *Sfta2* | surfactant associated 2 (Sfta2), mRNA. | 35.649707 | 35.650569 |
| 195 | *Vars2* | valyl-tRNA synthetase 2, mitochondrial | 35.655634 | 35.667592 |
| 196 | *Gtf2h4* | general transcription factor II H, polypeptide 4 | 35.667727 | 35.673743 |
| 197 | *AK079703* | 0 day neonate thymus cDNA, RIKEN full-length enriched library, clone:A430019G01 product:unclassifiable, full insert sequence. | 35.671581 | 35.671946 |
| 198 | *Ddr1* | discoidin domain receptor family, member 1 | 35.681566 | 35.702044 |
| 199 | *4833427F10Rik* | RIKEN cDNA 4833427F10 gene | 35.772449 | 35.780687 |
| 200 | *Ier3* | immediate early response 3 | 35.821712 | 35.822911 |
| 201 | *Flot1* | flotillin 1 | 35.823356 | 35.832787 |
| 202 | *Tubb5* | tubulin, beta 5 class I | 35.833919 | 35.838301 |
| 203 | *Mdc1* | mediator of DNA damage checkpoint 1 | 35.841497 | 35.85967 |
| 204 | *5530401N12Rik* | RIKEN cDNA 5530401N12 gene | 35.860917 | 35.866886 |
| 205 | *Nrm* | nurim (nuclear envelope membrane protein) | 35.861317 | 35.8654 |
| 206 | *Ppp1r18* | protein phosphatase 1, regulatory subunit 18 (Ppp1r18), transcript variant 2, mRNA. | 35.866127 | 35.875596 |
| 207 | *Dhx16* | DEAH (Asp-Glu-Ala-His) box polypeptide 16 | 35.879777 | 35.892668 |
| 208 | *2310061I04Rik* | RIKEN cDNA 2310061I04 gene | 35.892676 | 35.89712 |
| 209 | *AK034502* | adult male diencephalon cDNA, RIKEN full-length enriched library, clone:9330209A01 product:unclassifiable, full insert sequence. | 35.896945 | 35.912215 |
| 210 | *Atat1* | alpha tubulin acetyltransferase 1 (Atat1), transcript variant 1, mRNA. | 35.897597 | 35.910068 |
| 211 | *2610110G12Rik* | RIKEN cDNA 2610110G12 gene | 35.899828 | 35.910068 |
| 212 | *Mrps18b* | mitochondrial ribosomal protein S18B | 35.910384 | 35.916369 |
| 213 | *Ppp1r10* | protein phosphatase 1, regulatory subunit 10 | 35.916982 | 35.927086 |
| 214 | *Mir1894* | microRNA 1894 (Mir1894), microRNA. | 35.917888 | 35.917969 |
| 215 | *2810427A07Rik* | RIKEN cDNA 2810427A07 gene | 35.92035 | 35.920942 |
| 216 | *Gm8801* | predicted gene 8801 (Gm8801), non-coding RNA. | 35.947153 | 35.953317 |
| 217 | *Abcf1* | ATP-binding cassette, sub-family F (GCN20), member 1 | 35.956818 | 35.96975 |
| 218 | *Mir877* | microRNA 877 (Mir877), microRNA. | 35.960729 | 35.960814 |
| 219 | *Prr3* | proline-rich polypeptide 3 | 35.977755 | 35.979467 |
| 220 | *Gna-rs1* | guanine nucleotide binding protein, related sequence 1 | 35.979954 | 35.989462 |
| 221 | *Gnl1* | guanine nucleotide binding protein-like 1 (Gnl1), mRNA. | 35.979954 | 35.989462 |
| 222 | *A930015D03Rik* | RIKEN cDNA A930015D03 gene | 35.994503 | 36.038174 |
| 223 | *H2-T24* | histocompatibility 2, T region locus 24 | 36.005694 | 36.02056 |
| 224 | *H2-T23* | histocompatibility 2, T region locus 23 | 36.029976 | 36.032701 |
| 225 | *H2-T22* | histocompatibility 2, T region locus 22 | 36.038408 | 36.042702 |
| 226 | *H2-T17* | histocompatibility 2, T region locus 17 | 36.038408 | 36.042692 |
| 227 | *H2-T9* | histocompatibility 2, T region locus 9 | 36.038408 | 36.042692 |
| 228 | *Gm6034* | predicted gene 6034 (Gm6034), mRNA. | 36.04296 | 36.058645 |
| 229 | *Gm11127* | predicted gene 11127 (Gm11127), mRNA. | 36.055815 | 36.058371 |
| 230 | *H2-Bl* | histocompatibility 2, blastocyst | 36.080188 | 36.084249 |
| 231 | *C920025E04Rik* | histocompatibility 2, T region locus, pseudogene | 36.109029 | 36.111676 |
| 232 | *BC023719* | cDNA sequence BC023719 | 36.111428 | 36.117123 |
| 233 | *H2-T10* | histocompatibility 2, T region locus 10 | 36.11587 | 36.121444 |
| 234 | *EG547347* | predicted gene 6034 | 36.121818 | 36.129692 |
| 235 | *Gm7030* | predicted gene 7030 (Gm7030), mRNA. | 36.127608 | 36.129425 |
| 236 | *AK161769* | adult male thymus cDNA, RIKEN full-length enriched library, clone:5830475C17 product:unclassifiable, full insert sequence. | 36.141748 | 36.145744 |
| 237 | *2410017I17Rik* | RIKEN cDNA 2410017I17 gene (2410017I17Rik), long non-coding RNA. | 36.145017 | 36.162374 |
| 238 | *Gm8909* | predicted gene 8909 (Gm8909), mRNA. | 36.164443 | 36.168537 |
| 239 | *EG667977* | predicted gene, EG667977 | 36.164972 | 36.168522 |
| 240 | *Gm6623* | predicted gene 6623 (Gm6623), non-coding RNA. | 36.178776 | 36.181364 |
| 241 | *LOC625785* | RIKEN cDNA 6330407G11 pseudogene | 36.17902 | 36.179837 |
| 242 | *H2-T3* | histocompatibility 2, T region locus 3 | 36.18557 | 36.190151 |
| 243 | *H2-T18* | histocompatibility 2, T region locus 18 | 36.185573 | 36.19022 |
| 244 | *H2-Tw3* | similar to histocompatibility 2, T region locus 3 | 36.186575 | 36.190122 |
| 245 | *H2-T3-like* | MHC class I antigen | 36.186575 | 36.190119 |
| 246 | *AK138323* | adult male hypothalamus cDNA, RIKEN full-length enriched library, clone:A230067H11 product:unclassifiable, full insert sequence. | 36.24882 | 36.253679 |
| 247 | *Rpp21* | ribonuclease P 21 subunit | 36.255672 | 36.257846 |
| 248 | *Trim39* | tripartite motif-containing 39 | 36.258872 | 36.272004 |
| 249 | *H2-M10.2* | histocompatibility 2, M region locus 10.2 | 36.284226 | 36.286421 |
| 250 | *H2-M10.1* | histocompatibility 2, M region locus 10.1 | 36.322859 | 36.32615 |
| 251 | *H2-M10.3* | histocompatibility 2, M region locus 10.3 | 36.365003 | 36.368417 |
| 252 | *H2-M10.4* | histocompatibility 2, M region locus 10.4 | 36.460161 | 36.462329 |
| 253 | *H2-M11* | histocompatibility 2, M region locus 11 | 36.547074 | 36.549252 |
| 254 | *EG224763* | predicted gene, EG224763 | 36.585326 | 36.585376 |
| 255 | *H2-M9* | histocompatibility 2, M region locus 9 | 36.640424 | 36.642644 |
| 256 | *H2-M1* | histocompatibility 2, M region locus 1 | 36.670007 | 36.672197 |
| 257 | *H2-M10.5* | histocompatibility 2, M region locus 10.5 | 36.772909 | 36.776235 |
| 258 | *H2-M10.6* | histocompatibility 2, M region locus 10.6 | 36.812174 | 36.815566 |
| 259 | *Trim26* | tripartite motif-containing 26 | 36.837145 | 36.859398 |
| 260 | *Trim15* | tripartite motif-containing 15 | 36.86069 | 36.86721 |
| 261 | *Trim10* | tripartite motif-containing 10 | 36.869573 | 36.877833 |
| 262 | *Trim40* | tripartite motif-containing 40 | 36.881597 | 36.890125 |
| 263 | *Trim31* | tripartite motif-containing 31 | 36.898129 | 36.910217 |
| 264 | *A830092I05Rik* | RIKEN cDNA A830092I05 gene | 36.921894 | 36.922619 |
| 265 | *1700031A10Rik* | RIKEN cDNA 1700031A10 gene | 36.923791 | 36.933432 |
| 266 | *Rnf39* | ring finger protein 39 | 36.94305 | 36.947986 |
| 267 | *Ppp1r11* | protein phosphatase 1, regulatory (inhibitor) subunit 11 | 36.948354 | 36.951792 |
| 268 | *Znrd1* | zinc ribbon domain containing, 1 | 36.954357 | 36.958428 |
| 269 | *1700022C21Rik* | RIKEN cDNA 1700022C21 gene | 36.958591 | 36.965623 |
| 270 | *Znrd1as* | zinc ribbon domain containing 1, antisense (Znrd1as), mRNA. | 36.958591 | 36.965623 |
| 271 | *2410137M14Rik* | RIKEN cDNA 2410137M14 gene | 36.9777 | 36.981237 |
| 272 | *D130003B22Rik* | RIKEN cDNA D130003B22 gene | 36.986854 | 36.989504 |
| 273 | *H2-M5* | histocompatibility 2, M region locus 5 (H2-M5), mRNA. | 36.986854 | 36.989504 |
| 274 | *Zfp57* | zinc finger protein 57 | 37.002451 | 37.010729 |
| 275 | *Mog* | myelin oligodendrocyte glycoprotein | 37.010739 | 37.023398 |
| 276 | *Gabbr1* | gamma-aminobutyric acid (GABA) B receptor, 1 | 37.045965 | 37.074305 |
| 277 | *9430032L10Rik* | RIKEN cDNA 9430032L10 gene | 37.081224 | 37.082045 |
| 278 | *Olfr90* | olfactory receptor 90 | 37.08519 | 37.086236 |
| 279 | *Olfr91* | olfactory receptor 91 | 37.092933 | 37.093872 |
| 280 | *Olfr92* | olfactory receptor 92 | 37.111041 | 37.11198 |
| 281 | *Olfr93* | olfactory receptor 93 | 37.151031 | 37.15197 |
| 282 | *Ubd* | ubiquitin D | 37.193891 | 37.196101 |
| 283 | *Olfr94* | olfactory receptor 94 | 37.196805 | 37.197966 |
| 284 | *Olfr95* | olfactory receptor 95 | 37.210912 | 37.211851 |
| 285 | *Olfr96* | olfactory receptor 96 | 37.225126 | 37.226068 |
| 286 | *Olfr97* | olfactory receptor 97 | 37.231435 | 37.232368 |
| 287 | *Olfr98* | olfactory receptor 98 | 37.262732 | 37.263662 |
| 288 | *H2-M3* | histocompatibility 2, M region locus 3 | 37.270233 | 37.274485 |
| 289 | *Olfr99* | olfactory receptor 99 | 37.2795 | 37.280418 |
| 290 | *Olfr101* | olfactory receptor 101 | 37.299493 | 37.30042 |
| 291 | *Olfr102* | olfactory receptor 102 | 37.31341 | 37.314437 |
| 292 | *Olfr100* | olfactory receptor 100 | 37.313456 | 37.314382 |
| 293 | *Olfr103* | olfactory receptor 103 | 37.336288 | 37.33723 |
| 294 | *Olfr104* | olfactory receptor 104 | 37.362107 | 37.363087 |
| 295 | *Olfr105* | olfactory receptor 105 | 37.382506 | 37.383486 |
| 296 | *Olfr106* | olfactory receptor 106 | 37.394529 | 37.39551 |
| 297 | *Olfr107* | olfactory receptor 107 | 37.405476 | 37.406509 |
| 298 | *Olfr108* | olfactory receptor 108 | 37.445479 | 37.446517 |
| 299 | *Olfr109* | olfactory receptor 109 | 37.466207 | 37.467152 |
| 300 | *H2-M2* | histocompatibility 2, M region locus 2 | 37.48085 | 37.483529 |
| 301 | *Olfr110* | olfactory receptor 110 | 37.492467 | 37.499674 |
| 302 | *Olfr111* | olfactory receptor 111 | 37.529956 | 37.530997 |
| 303 | *Olfr112* | olfactory receptor 112 | 37.563238 | 37.569451 |
| 304 | *Olfr113* | olfactory receptor 113 | 37.574482 | 37.575421 |
| 305 | *Olfr114* | olfactory receptor 114 | 37.589412 | 37.590351 |
| 306 | *Olfr115* | olfactory receptor 115 | 37.609784 | 37.610779 |
| 307 | *Olfr116* | olfactory receptor 116 | 37.623667 | 37.624633 |
| 308 | *Olfr117* | olfactory receptor 117 | 37.659377 | 37.660331 |
| 309 | *Olfr118* | olfactory receptor 118 | 37.672024 | 37.67299 |
| 310 | *Olfr119* | olfactory receptor 119 | 37.696684 | 37.701637 |
| 311 | *Olfr120* | olfactory receptor 120 | 37.725998 | 37.726991 |
| 312 | *Olfr121* | olfactory receptor 121 | 37.748865 | 37.753004 |
| 313 | *Olfr122* | olfactory receptor 122 | 37.768641 | 37.77262 |
| 314 | *Olfr123* | olfactory receptor 123 | 37.795445 | 37.796375 |
| 315 | *Olfr124* | olfactory receptor 124 | 37.805068 | 37.80619 |
| 316 | *Olfr125* | olfactory receptor 125 | 37.83491 | 37.836028 |
| 317 | *Olfr126* | olfactory receptor 126 | 37.850593 | 37.851553 |
| 318 | *Olfr127* | olfactory receptor 127 | 37.903547 | 37.904519 |
| 319 | *Olfr128* | olfactory receptor 128 | 37.923567 | 37.924494 |
| 320 | *Olfr761* | olfactory receptor 761 | 37.95205 | 37.953022 |
| 321 | *Olfr129* | olfactory receptor 129 | 38.054598 | 38.059784 |
| 322 | *Olfr130* | olfactory receptor 130 | 38.067172 | 38.068126 |
| 323 | *Olfr131* | olfactory receptor 131 | 38.082031 | 38.082976 |
| 324 | *Olfr132* | olfactory receptor 132 | 38.130248 | 38.13119 |
| 325 | *Olfr133* | olfactory receptor 133 | 38.148589 | 38.149528 |
| 326 | *Olfr134* | olfactory receptor 134 | 38.175085 | 38.176024 |
| 327 | *Olfr135* | olfactory receptor 135 | 38.208246 | 38.209185 |
| 328 | *Olfr138* | olfactory receptor 138 | 38.274772 | 38.275711 |
| 329 | *Olfr137* | olfactory receptor 137 | 38.30452 | 38.305459 |
| 330 | *Olfr136* | olfactory receptor 136 | 38.335158 | 38.336097 |
| 331 | *Esp36* | exocrine gland secreted peptide 36 | 38.416473 | 38.420185 |
| 332 | *Esp34* | exocrine gland secreted peptide 34 | 38.554191 | 38.560621 |
| 333 | *Esp31* | exocrine gland secreted peptide 31 | 38.639446 | 38.645653 |
| 334 | *Esp24* | exocrine gland secreted peptide 24 | 39.036694 | 39.040227 |
| 335 | *Esp23* | exocrine gland secreted peptide 23 | 39.07369 | 39.077037 |
| 336 | *Esp18* | exocrine gland secreted peptide 18 | 39.406358 | 39.410992 |
| 337 | *Esp16* | exocrine gland secreted peptide 16 | 39.536141 | 39.540847 |
| 338 | *EG668200* | predicted gene, EG668200 | 39.640956 | 39.645665 |
| 339 | *Esp15* | exocrine gland secreted peptide 15 (Esp15), mRNA. | 39.640956 | 39.645667 |
| 339 | Esp15 | exocrine gland secreted peptide 15 (Esp15), mRNA. |  | NM_001244651 |

**Table S6: SNPs in the significant location of Akr1d1 in female kidney.**

| Source: WebQTL, The GeneNetwork (http://www.genenetwork.org) | | | | | | |
| --- | --- | --- | --- | --- | --- | --- |
| Date and Time (US Center): Mar 03, 2021 at 04.14 PM | | | | | | |
| Trait ID: Mouse kidney M430v2 Female (Aug06) RMA : 1455100_at | | | | | | |
| Significant LRS = 18.21 | | | | | | |
| Locus | **cM** | **Mb** | **LRS** | **P-value** | **Additive** | **Gene** |
| rs30802214 | 32.85 | 81.381 | 18.336 | 0.039 | 0.418 | None |
| rs31282914 | 32.85 | 81.524 | 18.336 | 0.039 | 0.418 | None |
| rs32270416 | 32.97 | 81.579 | 18.336 | 0.039 | 0.418 | None |
| rs31131715 | 32.97 | 82.457 | 18.336 | 0.039 | 0.418 | None |
| rs211974888 | 33.1 | 83.144 | 18.336 | 0.039 | 0.418 | None |

**Table S7: SNPs in the significant LRS location of Akr1d1 in female pituitary.**

| Source: WebQTL, The GeneNetwork (http://www.genenetwork.org) | | | | | | | |
| --- | --- | --- | --- | --- | --- | --- | --- |
| Trait ID: INIA Pituitary Affy MoGene 1.0ST (Jun12) RMA Females : 10537306 | | | | | | | |
| Significant LRS = 17.55 | | | | | | | |
| Index | **Locus** | **cM** | **Mb** | **LRS** | **P-value** | **Additive** | **Gene** |
| 1 | rs49184954 | 30.66 | 55.608 | 17.579 | 0.047 | 0.157 | None |
| 2 | rs32328305 | 30.79 | 56.124 | 17.579 | 0.047 | 0.157 | *Herc2* |
| 3 | rs32537380 | 30.79 | 56.352 | 17.579 | 0.047 | 0.157 | None |
| 4 | rs13479268 | 30.92 | 56.524 | 17.579 | 0.047 | 0.157 | None |
| 5 | rs32424606 | 31.04 | 56.597 | 17.579 | 0.047 | 0.157 | None |
| 6 | rs6295848 | 31.04 | 58.285 | 17.579 | 0.047 | 0.157 | None |

**Table S8: Genes in the significant LRS region (Chr 7 55.608000 - 58.285000 Mb) of Akr1d1 in female pituitary.**

| GeneNetwork Interval Analyst Table | | | | |
| --- | --- | --- | --- | --- |
| http://www.genenetwork.org/webqtl/main.py?FormID=intervalAnalyst | | | | |
| view region : Chr 7 55.608000 - 58.285000 Mb | | | | |
| Index | **Gene** | **Description (mm10)** | **Start (mm10)** | **End (mm10)** |
| 1 | *Siglech* | sialic acid binding Ig-like lectin H | 55.768183 | 55.778925 |
| 2 | *Tubgcp5* | tubulin, gamma complex associated protein 5 | 55.794147 | 55.827099 |
| 3 | *Cyfip1* | cytoplasmic FMR1 interacting protein 1 | 55.84207 | 55.932633 |
| 4 | *Nipa2* | non imprinted in Prader-Willi/Angelman syndrome 2 homolog (human) | 55.931265 | 55.962493 |
| 5 | *A230056P14Rik* | RIKEN cDNA A230056P14 gene | 55.96253 | 55.980096 |
| 6 | *Nipa1* | non imprinted in Prader-Willi/Angelman syndrome 1 homolog (human) | 55.978483 | 56.019573 |
| 7 | *Herc2* | HECT and RLD domain containing E3 ubiquitin protein ligase 2 | 56.050154 | 56.231798 |
| 8 | *Oca2* | oculocutaneous albinism II | 56.23977 | 56.536517 |
| 9 | *rjs* | rjs (rjs) mRNA, rjs-p25H allele, partial cds. | 56.242186 | 56.243152 |
| 10 | *6330406O05Rik* | RIKEN cDNA 6330406O05 gene | 56.716467 | 56.717763 |
| 11 | *Gabrg3* | gamma-aminobutyric acid (GABA) A receptor, subunit gamma 3 | 56.724241 | 57.386871 |
| 12 | *Gm1693* | gene model 1693, (NCBI) | 57.01181 | 57.01186 |
| 13 | *Gm9962* | predicted gene 9962 (Gm9962), long non-coding RNA. | 57.387271 | 57.409941 |
| 14 | *Gabra5* | gamma-aminobutyric acid (GABA) A receptor, subunit alpha 5 | 57.407668 | 57.510009 |
| 15 | *Mir6389* | microRNA 6389 (Mir6389), microRNA. | 57.58106 | 57.581162 |
| 16 | *Gabrb3* | gamma-aminobutyric acid (GABA) A receptor, subunit beta 3 | 57.590517 | 57.828801 |

**Table S9: SNPs and its corresponding genes locates in significant e-QTL of Cyp7b1 in kidney female.**

| Source: WebQTL, The GeneNetwork (http://www.genenetwork.org) | | | | | | | |
| --- | --- | --- | --- | --- | --- | --- | --- |
| Trait ID: Mouse kidney M430v2 Female (Aug06) RMA : 1421074_at | | | | | | | |
| Significant LRS = 16.85 | | | | | | | |
| Index | **Locus** | **cM** | **Mb** | **LRS** | **P-value** | **Additive** | **Genes** |
| 1 | rs6374387 | 60.79 | 125.479 | 17.185 | 0.051 | 0.266 | *Fbn1* |
| 2 | rs47779992 | 60.79 | 125.803 | 17.299 | 0.049 | 0.271 | none |
| 3 | rs48248491 | 62.84 | 134.462 | 21.884 | 0.003 | 0.3 | none |
| 4 | rs13476784 | 63.36 | 134.519 | 22.096 | 0.003 | 0.293 | *Hao1* |
| 5 | rs27231678 | 63.36 | 134.801 | 21.93 | 0.003 | 0.295 | *Plcb1* |
| 6 | rs27285185 | 64.29 | 134.897 | 21.93 | 0.003 | 0.295 | *Plcb1* |
| 7 | rs33742727 | 64.29 | 134.911 | 21.93 | 0.003 | 0.295 | *Plcb1* |
| 8 | rs27268196 | 64.42 | 134.932 | 21.93 | 0.003 | 0.295 | *Plcb1* |
| 9 | rs27268155 | 64.42 | 134.945 | 21.93 | 0.003 | 0.295 | *Plcb1* |
| 10 | rs51176438 | 64.55 | 134.952 | 21.93 | 0.003 | 0.295 | *Plcb1* |
| 11 | rs27252871 | 64.55 | 135.859 | 22.096 | 0.003 | 0.293 | *Plcb4* |
| 12 | rs29523263 | 64.81 | 135.88 | 22.096 | 0.003 | 0.293 | *Plcb4* |
| 13 | rs29716787 | 64.81 | 135.933 | 22.096 | 0.003 | 0.293 | *Plcb4* |
| 14 | rs218995235 | 64.93 | 136.127 | 18.512 | 0.026 | 0.273 | *Pak5* |
| 15 | rs27237140 | 65.32 | 136.128 | 18.374 | 0.029 | 0.272 | *Pak5* |
| 16 | rs33733849 | 65.32 | 136.129 | 18.374 | 0.029 | 0.272 | *Pak5* |
| 17 | Affy_PC2_137 | 65.58 | 137 | 21.192 | 0.005 | 0.291 | none |
| 18 | rs6206791 | 70.38 | 149.666 | 17.867 | 0.038 | 0.27 | none |
| 19 | rs27352250 | 70.51 | 150.659 | 17.867 | 0.038 | 0.27 | *Acss1* |
| 20 | rs33769134 | 71.03 | 152.615 | 17.867 | 0.038 | 0.27 | none |
| 21 | rs47603435 | 71.03 | 152.616 | 17.867 | 0.038 | 0.27 | none |
| 22 | rs51545418 | 71.16 | 153.171 | 17.867 | 0.038 | 0.27 | *Tm9sf4* |
| 23 | rs6376291 | 71.16 | 154.141 | 17.867 | 0.038 | 0.27 | none |
| 24 | rs32933958 | 71.16 | 154.589 | 17.867 | 0.038 | 0.27 | *Pxmp4* |

**Table S10: Candidate genes of Cyp7b1 in kidney female.**

| view region: Chr 2 134.497000 - 135.600000 Mb | | | | | |
| --- | --- | --- | --- | --- | --- |
| Index | **Gene** | **Description (mm10)** | **Start (mm10)** | **End (mm10)** | **Gene ID (mm10)** |
| 1 | *Fbn1* | fibrillin 1 | 125.3006 | 125.5064 | 14118 |
| 2 | *Hao1* | hydroxyacid oxidase 1, liver | 134.4974 | 134.5544 | 15112 |
| 3 | *Plcb1* | phospholipase C, beta 1 | 134.7862 | 135.4753 | 18795 |
| 4 | *Plcb4* | phospholipase C, beta 4 | 135.6595 | 135.9831 | 18798 |
| 5 | *Pak7* | p21 protein (Cdc42/Rac)-activated kinase 7 | 136.0811 | 136.388 | 241656 |
| 6 | *Acss1* | acyl-CoA synthetase short-chain family member 1 | 150.6181 | 150.6682 | 68738 |
| 7 | *Tm9sf4* | transmembrane 9 superfamily protein member 4 | 153.1613 | 153.2049 | 99237 |
| 8 | *Pxmp4* | peroxisomal membrane protein 4 | 154.587 | 154.6037 | 59038 |

**Table S11: SNPs and its corresponding genes locate in significant e-QTL of Cyp7b1 in male pituitary.**

| Source: WebQTL, The GeneNetwork (http://www.genenetwork.org) | | | | | | | |
| --- | --- | --- | --- | --- | --- | --- | --- |
| Trait ID: INIA Pituitary Affy MoGene 1.0ST (Jun12) RMA Males : 10497381 | | | | | | | |
| Significant LRS = 18.12 | | | | | | | |
| Index | **Locus** | **cM** | **Mb** | **LRS** | **P-value** | **Additive** | **Genes** |
| 1 | rs30705815 | 78.79 | 148.61 | 18.509 | 0.028 | 0.117 | *Gm6313* |
| 2 | UNCHS019382 | 78.79 | 148.67 | 18.509 | 0.028 | 0.117 | *4930528G23Rik* |
| 3 | rs3659280 | 78.92 | 148.74 | 18.509 | 0.028 | 0.117 | None |
| 4 | UNCHS019385 | 78.92 | 148.82 | 18.509 | 0.028 | 0.117 | *Ipo8* |
| 5 | rs30950360 | 79.43 | 149.27 | 18.41 | 0.03 | 0.12 | None |

**Table S12: Candidate genes of Cyp7b1 in pituitary male.**

| view region : Chr 6 148.606000 - 148.818000 Mb | | | | |
| --- | --- | --- | --- | --- |
| Index | **Gene** | **Description (mm10)** | **Start (mm10)** | **End (mm10)** |
| 1 | *EG622319* | predicted gene, EG622319 | 148.606785 | 148.614309 |
| 2 | *Gm6313* | predicted gene 6313 (Gm6313), long non-coding RNA. | 148.606785 | 148.614309 |
| 3 | *4930528G23Rik* | RIKEN cDNA 4930528G23 gene | 148.659977 | 148.678 |
| 4 | *Ipo8* | importin 8 | 148.770683 | 148.831467 |

**Table S13: SNPs and its corresponding genes locates in significant e-QTL of Slc7a13 in pituitary male Chr 16.**

| Source: WebQTL, The GeneNetwork (http://www.genenetwork.org) | | | | | | | |
| --- | --- | --- | --- | --- | --- | --- | --- |
| Trait ID: INIA Pituitary Affy MoGene 1.0ST (Jun12) RMA Males : 10503497 | | | | | | | |
| Significant LRS = 16.92 | | | | | | | |
| Index | **Locus** | **cM** | **Mb** | **LRS** | **P-value** | **Additive** | **Genes** |
| 1 | rs4165334 | 10.33 | 23.468 | 19.274 | 0.017 | -0.093 | *Masp1* |
| 2 | rs4165343 | 11.26 | 23.684 | 19.274 | 0.017 | -0.093 | none |
| 3 | rs4165425 | 11.26 | 23.797 | 19.274 | 0.017 | -0.093 | none |
| 4 | rs4165440 | 11.65 | 24.176 | 19.274 | 0.017 | -0.093 | none |

**Table S14: Candidate genes of Slc7a13 in pituitary male Chr 16.**

| view region : Chr 16 22.300000 - 24.700000 Mb | | | | |
| --- | --- | --- | --- | --- |
| Index | **Gene** | **Description (mm10)** | **Start (mm10)** | **End (mm10)** |
| 1 | *Etv5* | ets variant 5 | 22.381312 | 22.43656 |
| 2 | *Dgkg* | diacylglycerol kinase, gamma | 22.466568 | 22.657231 |
| 3 | *9230117E06Rik* | RIKEN cDNA 9230117E06 gene | 22.511479 | 22.517685 |
| 4 | *Mir8095* | microRNA 8095 (Mir8095), microRNA. | 22.532055 | 22.532184 |
| 5 | *Mir6362* | microRNA 6362 (Mir6362), microRNA. | 22.605325 | 22.605432 |
| 6 | *Crygs* | crystallin, gamma S | 22.805202 | 22.81141 |
| 7 | *Tbccd1* | TBCC domain containing 1 | 22.813213 | 22.857669 |
| 8 | *Dnajb11* | DnaJ heat shock protein family (Hsp40) member B11 | 22.857844 | 22.872465 |
| 9 | *Gm30505* | predicted gene, 30505 (Gm30505), long non-coding RNA. | 22.874982 | 22.894386 |
| 10 | *Ahsg* | alpha-2-HS-glycoprotein | 22.892014 | 22.899451 |
| 11 | *Fetub* | fetuin beta | 22.920221 | 22.939768 |
| 12 | *Hrg* | histidine-rich glycoprotein | 22.951071 | 22.961659 |
| 13 | *Kng2* | kininogen 2 | 22.985851 | 23.029101 |
| 14 | *Kng1* | kininogen 1 | 23.058299 | 23.080006 |
| 15 | *Eif4a2* | eukaryotic translation initiation factor 4A2 | 23.107467 | 23.114132 |
| 16 | *Snord2* | small nucleolar RNA, C/D box 2 (Snord2), small nucleolar RNA. | 23.108952 | 23.10902 |
| 17 | *Snora81* | small nucleolar RNA, H/ACA box 81 (Snora81), small nucleolar RNA. | 23.110769 | 23.110933 |
| 18 | *Rfc4* | replication factor C (activator 1) 4 | 23.113947 | 23.12773 |
| 19 | *6330408M09Rik* | RIKEN cDNA 6330408M09 gene | 23.127792 | 23.128675 |
| 20 | *Adipoq* | adiponectin, C1Q and collagen domain containing | 23.146535 | 23.157968 |
| 21 | *BC098222* | cDNA clone IMAGE:1344898. | 23.175279 | 23.204376 |
| 22 | *B630019A10Rik* | RIKEN cDNA B630019A10 gene | 23.175287 | 23.224446 |
| 23 | *AK050351* | adult male liver tumor cDNA, RIKEN full-length enriched library, clone:C730040G15 product: unclassifiable, full insert sequence. | 23.192149 | 23.203867 |
| 24 | *C730014E05Rik* | RIKEN cDNA C730014E05 gene | 23.20322 | 23.206581 |
| 25 | *BC106179* | cDNA sequence BC106179 | 23.220665 | 23.22533 |
| 26 | *St6gal1* | beta galactoside alpha 2,6 sialyltransferase 1 | 23.22602 | 23.36035 |
| 27 | *5830449F15Rik* | RIKEN cDNA 5830449F15 gene | 23.28016 | 23.280685 |
| 28 | *4833423F13Rik* | RIKEN cDNA 4833423F13 gene | 23.294064 | 23.295152 |
| 29 | *Rtp1* | receptor transporter protein 1 | 23.429132 | 23.43396 |
| 30 | *Masp1* | mannan-binding lectin serine peptidase 1 | 23.451784 | 23.52059 |
| 31 | *AK144897* | lung RCB-0558 LLC cDNA, RIKEN full-length enriched library, clone: G730049K06 product: unclassifiable, full insert sequence. | 23.520318 | 23.56008 |
| 32 | *Rtp4* | receptor transporter protein 4 | 23.609918 | 23.614222 |
| 33 | *Sst* | somatostatin | 23.88958 | 23.890844 |
| 34 | *Rtp2* | receptor transporter protein 2 | 23.925547 | 23.930794 |
| 35 | *Bcl6* | B cell leukemia/lymphoma 6 | 23.965051 | 23.988612 |
| 36 | *2900064B18Rik* | RIKEN cDNA 2900064B18 gene | 23.985597 | 23.986729 |
| 37 | *1110054M08Rik* | RIKEN cDNA 1110054M08 gene | 24.306998 | 24.307048 |
| 38 | *Lppos* | LIM domain containing preferred translocation partner in lipoma, opposite strand (Lppos), long non-coding RNA. | 24.392555 | 24.393655 |
| 39 | *Lpp* | LIM domain containing preferred translocation partner in lipoma | 24.44809 | 24.992578 |
| 40 | *Morf4l1-ps1* | mortality factor 4 like 1, pseudogene 1 (Morf4l1-ps1), non-coding RNA. | 24.529313 | 24.534472 |
| 41 | *EG627352* | predicted gene, EG627352 | 24.530453 | 24.530906 |
| 42 | *A730098P11Rik* | RIKEN cDNA A730098P11 gene | 24.532038 | 24.532954 |

**Table S15: SNPs and its corresponding genes of Sah in female kidney Chr 7**

| Source: WebQTL, The GeneNetwork (http://www.genenetwork.org) | | | | | | | |
| --- | --- | --- | --- | --- | --- | --- | --- |
| Trait ID: Mouse kidney M430v2 Female (Aug06) RMA: 1425559_a_at | | | | | | | |
| Significant LRS = 16.85 | | | | | | | |
| Index | **Locus** | **cM** | **Mb** | **LRS** | **P-value** | **Additive** | **Genes** |
| 1 | rs48257525 | 59.76 | 118.835 | 19.737 | 0.014 | 0.299 | None |
| 2 | rs31527590 | 59.89 | 118.933 | 19.737 | 0.014 | 0.299 | *Iqck* |
| 3 | rs32102281 | 59.89 | 119.173 | 19.737 | 0.014 | 0.299 | *Gpr139* |
| 4 | rs32521052 | 60.02 | 119.176 | 21.049 | 0.009 | 0.305 | *Gpr139* |
| 5 | rs32549379 | 60.02 | 119.513 | 21.049 | 0.009 | 0.305 | *Pdilt* |
| 6 | rs31513472 | 60.41 | 119.526 | 21.049 | 0.009 | 0.305 | *Acsm5* |
| 7 | D7Mit330 | 60.53 | 119.657 | 22.532 | 0.003 | 0.312 | *Acsm1* |
| 8 | rs261691965 | 60.53 | 120.148 | 22.532 | 0.003 | 0.312 | None |
| 9 | rs31052046 | 60.66 | 120.193 | 22.532 | 0.003 | 0.312 | *Tmem159* |
| 10 | rs32471611 | 60.79 | 120.251 | 23.027 | 0.003 | 0.316 | *Abca14* |
| 11 | rs6322316 | 60.79 | 120.693 | 23.027 | 0.003 | 0.316 | *Mosmo* |

**Table S16: SNPs and its corresponding genes of Sah in female hypothalamus Chr 2**

| Source: WebQTL, The GeneNetwork (http://www.genenetwork.org) | | | | | | | |
| --- | --- | --- | --- | --- | --- | --- | --- |
| Trait ID: INIA Hypothalamus Affy MoGene 1.0 ST (Nov10) Female : 10556769 | | | | | | | |
| Significant LRS = 18.01 | | | | | | | |
| Index | **Locus** | **cM** | **Mb** | **LRS** | **P-value** | **Additive** | Genes |
| 1 | rs27472920 | 54.25 | 107.154 | 25.999 | 0.002 | -0.107 | None |
| 2 | rs6242654 | 54.38 | 107.241 | 25.999 | 0.002 | -0.107 | None |
| 3 | rs13476689 | 54.51 | 107.465 | 25.999 | 0.002 | -0.107 | None |
| 4 | rs27469498 | 54.51 | 108.091 | 25.999 | 0.002 | -0.107 | None |
| 5 | rs33051394 | 54.77 | 108.098 | 25.999 | 0.002 | -0.107 | None |
| 6 | rs27508892 | 54.89 | 108.355 | 25.999 | 0.002 | -0.107 | None |
| 7 | rs33591583 | 55.02 | 108.777 | 25.999 | 0.002 | -0.107 | None |
| 8 | rs27493247 | 55.28 | 109.524 | 25.999 | 0.002 | -0.107 | None |
| 9 | rs27474179 | 55.4 | 109.72 | 25.999 | 0.002 | -0.107 | *Bdnf* |
| 10 | rs27524311 | 55.4 | 109.734 | 25.999 | 0.002 | -0.107 | None |
| 11 | rs6208879 | 55.53 | 109.783 | 25.999 | 0.002 | -0.107 | None |
| 12 | rs46123095 | 55.53 | 109.954 | 25.999 | 0.002 | -0.107 | None |
| 13 | rs6318808 | 55.66 | 109.99 | 25.999 | 0.002 | -0.107 | None |
| 14 | rs33662570 | 55.66 | 110.047 | 25.999 | 0.002 | -0.107 | *1700024P03Rik* |
| 15 | UNC020317359 | 55.79 | 110.413 | 25.999 | 0.002 | -0.107 | None |
| 16 | rs29716654 | 55.79 | 110.518 | 25.999 | 0.002 | -0.107 | None |
| 17 | rs33491937 | 55.91 | 110.704 | 25.999 | 0.002 | -0.107 | *Ano3, Tmem16c* |
| 18 | rs33283452 | 55.91 | 112.09 | 25.999 | 0.002 | -0.107 | None |
| 19 | rs50748091 | 55.91 | 112.244 | 25.999 | 0.002 | -0.107 | *Agpat7, Lpcat4* |
| 20 | rs51927292 | 56.57 | 112.276 | 37.013 | - | -0.12 | *Slc12a6* |
| 21 | rs52710187 | 56.57 | 112.28 | 37.013 | - | -0.12 | *Slc12a6* |
| 22 | rs3681694 | 56.7 | 112.285 | 37.013 | - | -0.12 | *Slc12a6* |
| 23 | rs27506268 | 56.82 | 112.458 | 37.013 | - | -0.12 | *Emc7* |
| 24 | rs29538830 | 56.82 | 113.346 | 37.013 | - | -0.12 | *Fmn1* |
| 25 | rs29969758 | 56.95 | 113.445 | 34.114 | - | -0.118 | *Fmn1* |
| 26 | rs29556426 | 56.95 | 113.607 | 34.114 | - | -0.118 | None |
| 27 | rs27505237 | 57.08 | 113.631 | 34.114 | - | -0.118 | None |
| 28 | rs27491076 | 57.2 | 113.784 | 34.114 | - | -0.118 | *Scg5* |
| 29 | rs28271895 | 57.2 | 114.159 | 34.114 | - | -0.118 | *Aqr* |
| 30 | rs13476709 | 57.46 | 114.197 | 29.647 | - | -0.112 | *Zfp770* |
| 31 | rs27455097 | 57.46 | 114.317 | 29.647 | - | -0.112 | None |
| 32 | rs33376011 | 57.72 | 114.321 | 29.647 | - | -0.112 | None |
| 33 | rs50126298 | 57.72 | 115.34 | 29.647 | - | -0.112 | *4930528P14Rik* |
| 34 | rs27455574 | 57.84 | 115.411 | 29.647 | - | -0.112 | None |
| 35 | rs33213953 | 57.97 | 115.499 | 29.647 | - | -0.112 | *3110099E03Rik* |
| 36 | rs27426466 | 58.1 | 115.506 | 27.59 | 0.001 | -0.11 | *3110099E03Rik* |
| 37 | rs27426815 | 58.1 | 115.879 | 27.59 | 0.001 | -0.11 | *Meis2* |
| 38 | rs3708146 | 58.23 | 116.006 | 27.59 | 0.001 | -0.11 | *Meis2* |
| 39 | rs27434419 | 58.23 | 116.477 | 27.59 | 0.001 | -0.11 | None |
| 40 | rs6381234 | 58.61 | 116.722 | 28.709 | 0.001 | -0.11 | None |
| 41 | rs32914740 | 58.87 | 117 | 20.108 | 0.024 | -0.097 | None |
| 42 | rs13476723 | 58.87 | 117.293 | 20.108 | 0.024 | -0.097 | *Rasgrp1* |
| 43 | rs27456955 | 59 | 117.683 | 20.108 | 0.024 | -0.097 | None |
| 44 | rs27440124 | 59 | 118.865 | 20.108 | 0.024 | -0.097 | None |
| 45 | rs27440098 | 59.13 | 118.881 | 20.108 | 0.024 | -0.097 | *Ivd* |

**Table S17: SNPs and its corresponding genes locates on Chr 7 of Sah in male liver where has significant e-QTLs**

| Source: WebQTL, The GeneNetwork (http://www.genenetwork.org) | | | | | | | |
| --- | --- | --- | --- | --- | --- | --- | --- |
| Trait ID: GenEx BXD Sal Liver Affy M430 2.0 (Feb11) RMA Males : 1425559_a_at | | | | | | | |
| Significant LRS = 17.49 | | | | | | | |
| Index | Locus | cM | Mb | LRS | P-value | Additive | Genes |
| 1 | rs48257525 | 59.76 | 118.835 | 23.505 | 0.002 | -0.197 | *9030624J02Rik* |
| 2 | rs48353440 | 59.76 | 118.922 | 23.505 | 0.002 | -0.197 | *Iqck* |
| 3 | rs31527590 | 59.89 | 118.933 | 25.985 | - | -0.204 | *Iqck* |
| 4 | rs32102281 | 59.89 | 119.173 | 25.985 | - | -0.204 | *Gpr139* |
| 5 | rs32521052 | 60.02 | 119.176 | 25.985 | - | -0.204 | *Gpr139* |
| 6 | rs32549379 | 60.02 | 119.513 | 25.985 | - | -0.204 | *1700007B13Rik* |
| 7 | rs31513472 | 60.41 | 119.526 | 29.234 | - | -0.212 | *Acsm5* |
| 8 | D7Mit330 | 60.53 | 119.657 | 29.234 | - | -0.212 | *Acsm1* |
| 9 | rs261691965 | 60.53 | 120.148 | 29.234 | - | -0.212 | *None* |
| 10 | rs31052046 | 60.66 | 120.193 | 29.234 | - | -0.212 | *Crym* |
| 11 | rs32471611 | 60.79 | 120.251 | 29.234 | - | -0.212 | *Abca14* |
| 12 | rs6322316 | 60.79 | 120.693 | 28.697 | - | -0.212 | *Mosmo* |

**Table S18: SNPs and its corresponding genes locates on Chr 1 of *Sah* in female liver where has significant e-QTLs**

| Source: WebQTL, The GeneNetwork (http://www.genenetwork.org) | | | | | | | |
| --- | --- | --- | --- | --- | --- | --- | --- |
| Trait ID: GenEx BXD Sal Liver Affy M430 2.0 (Feb11) RMA Females: 1425559_a_at | | | | | | | |
| Significant LRS = 17.89 | | | | | | | |
| Index | **Locus** | **cM** | **Mb** | **LRS** | **P-value** | **Additive** | **Genes** |
| 1 | - | 17.01 | 32.332 | 18.116 | 0.051 | 0.188 | *Khdrbs2* |
| 2 | rs30598074 | 17.08 | 32.344 | 18.133 | 0.051 | 0.187 | None |
| 3 | rs13475795 | 17.08 | 32.498 | 18.133 | 0.051 | 0.187 | None |
| 4 | rs30849932 | 17.21 | 33.368 | 18.133 | 0.051 | 0.187 | None |
| 5 | rs46323879 | 17.34 | 33.722 | 18.133 | 0.051 | 0.187 | *Rab23* |
| 6 | rs31518908 | 17.34 | 34.163 | 18.133 | 0.051 | 0.187 | None |

**Table S19: SNPs and its corresponding genes of *Slco1a1*** **in female liver Chr 2**

| Source: WebQTL, The GeneNetwork (http://www.genenetwork.org) | | | | | | | |
| --- | --- | --- | --- | --- | --- | --- | --- |
| Trait ID: GenEx BXD Sal Liver Affy M430 2.0 (Feb11) RMA Females: 1420379_at | | | | | | | |
| Significant LRS = 18.22 | | | | | | | |
| Index | **Locus** | **cM** | **Mb** | **LRS** | **P-value** | **Additive** | **Genes** |
| 1 | rs27908812 | 24.21 | 48 | 19.082 | 0.029 | 0.573 | None |
| 2 | rs46538890 | 24.46 | 48.752 | 19.082 | 0.029 | 0.573 | None |

**Table S20: SNPs and its corresponding genes locates on** **Chr 18 of Slco1a1 in male spleen within significant e-QTLs**

| Source: WebQTL, The GeneNetwork (http://www.genenetwork.org) | | | | | | | |
| --- | --- | --- | --- | --- | --- | --- | --- |
| Trait ID: UTHSC Affy MoGene 1.0 ST Spleen (Dec10) RMA Males : 10548978 | | | | | | | |
| Significant LRS = 17.76 | | | | | | | |
| Index | **Locus** | **cM** | **Mb** | **LRS** | **P-value** | **Additive** | **Genes** |
| 1 | rs29690544 | 58.87 | 84.517 | 17.81 | 0.049 | -0.082 | None |
| 2 | rs29882288 | 59 | 84.947 | 17.81 | 0.049 | -0.082 | *Fbxo15, Timm21* |
| 3 | rs46393958 | 59.25 | 85.437 | 17.81 | 0.049 | -0.082 | None |
| 4 | rs47469125 | 59.25 | 85.499 | 17.81 | 0.049 | -0.082 | None |
| 5 | rs29667966 | 59.64 | 85.52 | 18.096 | 0.043 | -0.082 | None |
| 6 | rs29626263 | 59.64 | 85.611 | 18.096 | 0.043 | -0.082 | None |

**Table S21:** **SNPs and its corresponding genes of *Rxfp1* in spleen female Chr 15**

| Source: WebQTL, The GeneNetwork (http://www.genenetwork.org) | | | | | | |
| --- | --- | --- | --- | --- | --- | --- |
| Trait ID: UTHSC Affy MoGene 1.0 ST Spleen (Dec10) RMA Females : 10498852 | | | | | | |
| Suggestive LRS = 11.06. Significant LRS = 17.98 | | | | | | |
| Locus | **cM** | **Mb** | **LRS** | **P-value** | **Additive** | **Gene** |
| rs51999815 | 57.56 | 101.561 | 20.291 | 0.01 | 0.113 | *Krt90* |
| rs31909693 | 58.22 | 102.321 | 20.291 | 0.01 | 0.113 | *Espl1* |
| rs51366351 | 58.22 | 102.34 | 20.291 | 0.01 | 0.113 | *Aaas* |

**Table S22: Candidate genes on the Max LRS of *Rxfp1* in spleen female.**

| http://www.genenetwork.org/webqtl/main.py?FormID=intervalAnalyst | | | | |
| --- | --- | --- | --- | --- |
| view region : Chr 15 101.561000 - 102.340000 Mb | | | | |
| Index | **Gene** | **Description (mm10)** | **Start (mm10)** | **End (mm10)** |
| 1 | *Krt90* | keratin 90 | 101.552355 | 101.56295 |
| 2 | *Krt75* | keratin 75 | 101.563342 | 101.573904 |
| 3 | *Gm5476* | predicted gene 5476 (Gm5476), non-coding RNA. | 101.587316 | 101.588572 |
| 4 | *Gm5477* | predicted gene 5477 (Gm5477), non-coding RNA. | 101.608873 | 101.610479 |
| 5 | *Gm5414* | predicted gene 5414 (Gm5414), mRNA. | 101.624027 | 101.628188 |
| 6 | *EG406223* | predicted gene, EG406223 | 101.624028 | 101.628188 |
| 7 | *EG432987* | predicted gene, EG432987 | 101.643019 | 101.64738 |
| 8 | *Gm5478* | predicted pseudogene 5478 (Gm5478), non-coding RNA. | 101.643019 | 101.64738 |
| 9 | *Krt6b* | keratin 6B | 101.676022 | 101.680289 |
| 10 | *Krt6a* | keratin 6A | 101.689927 | 101.694305 |
| 11 | *Krt5* | keratin 5 | 101.707069 | 101.712891 |
| 12 | *Krt71* | keratin 71 | 101.733948 | 101.743097 |
| 13 | *Krt74* | keratin 74 | 101.754258 | 101.763504 |
| 14 | *Krt72* | keratin 72 | 101.776559 | 101.786458 |
| 15 | *Krt73* | keratin 73 | 101.793307 | 101.802332 |
| 16 | *Krt2* | keratin 2 | 101.810688 | 101.818169 |
| 17 | *Krt1* | keratin 1 | 101.845425 | 101.850786 |
| 18 | *Krt77* | keratin 77 | 101.859855 | 101.869618 |
| 19 | *Krt76* | keratin 76 | 101.88435 | 101.89292 |
| 20 | *Krt4* | keratin 4 | 101.918534 | 101.924735 |
| 21 | *Krt79* | keratin 79 | 101.929331 | 101.940324 |
| 22 | *Krt78* | keratin 78 | 101.946003 | 101.954287 |
| 23 | *Krt8* | keratin 8 | 101.99671 | 102.004342 |
| 24 | *Krt18* | keratin 18 | 102.028215 | 102.032026 |
| 25 | *Eif4b* | eukaryotic translation initiation factor 4B | 102.073772 | 102.090195 |
| 26 | *LOC676882* | hypothetical LOC676882 | 102.074451 | 102.075969 |
| 27 | *A030007N12Rik* | RIKEN cDNA A030007N12 gene | 102.077423 | 102.080224 |
| 28 | *Tns2* | tensin 2 (Tns2), mRNA. | 102.100412 | 102.113232 |
| 29 | *Tenc1* | tensin like C1 domain-containing phosphatase | 102.102987 | 102.116401 |
| 30 | *Spryd3* | SPRY domain containing 3 | 102.116527 | 102.136215 |
| 31 | *Igfbp6* | insulin-like growth factor binding protein 6 | 102.144185 | 102.149512 |
| 32 | *Soat2* | sterol O-acyltransferase 2 | 102.150574 | 102.163436 |
| 33 | *Csad* | cysteine sulfinic acid decarboxylase | 102.176997 | 102.189043 |
| 34 | *Zfp740* | zinc finger protein 740 | 102.20457 | 102.21561 |
| 35 | *Itgb7* | integrin beta 7 | 102.215994 | 102.231935 |
| 36 | *Rarg* | retinoic acid receptor, gamma | 102.234937 | 102.2465 |
| 37 | *EG432988* | predicted gene, EG432988 | 102.270562 | 102.274121 |
| 38 | *D15Mgi27* | DNA Segment, Chr 15, Mouse Genome Informatics 27 | 102.279455 | 102.281744 |
| 39 | *Mfsd5* | major facilitator superfamily domain containing 5 (Mfsd5), mRNA. | 102.279455 | 102.281744 |
| 40 | *Espl1* | extra spindle pole bodies 1, separase | 102.296292 | 102.324356 |
| 41 | *Pfdn5* | prefoldin 5 | 102.326115 | 102.331489 |
| 42 | *Myg1* | melanocyte proliferating gene 1 | 102.331708 | 102.338138 |
| 43 | *Aaas* | achalasia, adrenocortical insufficiency, alacrimia | 102.338246 | 102.350478 |

**Table S23: EDEGs in human liver**

| *Defb29* | *Drctnnb1a* | *Agpat1* | *Cd164l1* | *F2r* | *Itga1* | *Mcp* | *Creg* | *Lcn12* | *Plek2* |
| --- | --- | --- | --- | --- | --- | --- | --- | --- | --- |
| *C1qtnf4* | *Tmem98* | *Kdm2b* | *Slc35e3* | *Fgf6* | *Kcnk5* | *Mocs1* | *Sort1* | *Vamp2* | *Prlr* |
| *Stpg4* | *Slc29a4* | *Asah3* | *Tm7sf4* | *Fmo3* | *Prom1* | *Lgr8* | *Sox15* | *Mc1r* | *Rtn4* |
| *Spata3* | *Timm17a* | *Igfbpl1* | *Mrgpre* | *Frs3* | *Ctsb* | *Nfat5* | *Dhrs7* | *Cbr1* | *Strn* |
| *MINDY3* | *Stambpl1* | *Abcd2* | *Abcd2* | *Gng4* | *Cutl2* | *Odf4* | *Susd4* | *Ccnd1* | *Strn4* |
| *TTC39C* | *Atp6v0d2* | *Abcg2* | *Casp14* | *Htatip* | *Arsa* | *Omd* | *CIG30* | *Cd28* | *Tdl* |
| *NIPAL1* | *Adra2a* | *Cyp7b1* | *Brp44l* | *Ttll10* | *Lama3* | *Pgm3* | *Trim24* | *Bat2* | *Dmtn* |

**Table S24: STRING results of human DEGs**

| Biological Process (Gene Ontology) | | | | | | | | | | | | | | |
| --- | --- | --- | --- | --- | --- | --- | --- | --- | --- | --- | --- | --- | --- | --- |
| Positive Regulation of Intracellular Signal Transduction | | | | | | | | | | | | | | |
| Adra2a | Tdl | Fgf6 | Rtn4 | Itga1 | Cd28 | Rxfp2 | F2r | Mc1r | Prlr | C1qt Nf4 |  |  |  |  |
| Positive Regulation of Signal Transduction | | | | | | | | | | | | | | |
| Adra2a | Tdl | Fgf6 | Rtn4 | Itga1 | Cd28 | Rxfp2 | F2r | Ctsb | Mc1r | Prlr | C1qtnf4 | Cux2 | Agpat1 |  |
| Positive Regulation of Signaling | | | | | | | | | | | | | | |
| Adra2a | Tdl | Fgf6 | Rtn4 | Itga1 | Cd28 | Rxfp2 | F2r | Ctsb | Mc1r | Prlr | C1qtnf4 | Cux2 | Agpat1 | Vamp2 |
| Positive Regulation of Cell Communication | | | | | | | | | | | | | | |
| Adra2a | Tdl | Fgf6 | Rtn4 | Itga1 | Cd28 | Rxfp2 | F2r | Ctsb | Mc1r | Prlr | C1qtnf4 | Cux2 | Agpat1 | Vamp2 |
| Positive Regulation of Response to Stimulus | | | | | | | | | | | | | | |
| Adra2a | Tdl | Fgf6 | Rtn4 | Itga1 | Cd28 | Rxfp2 | F2r | Ctsb | Mc1r | Prlr | C1qtnf4 | Cux2 | Agpat1 | Susd4 |
| Regulation of Cell Population Proliferation | | | | | | | | | | | | | | |
| Adra2a | Tdl | Fgf6 | Rtn4 | Itga1 | Cd28 | Rxfp2 | F2r | Ctsb | Cyp7b1 | Ccnd1 | Trim24 | Kdm2b | Strn |  |
| Positive Regulation of Cellular Process | | | | | | | | | | | | | | |
| Adra2a | Tdl | Fgf6 | Rtn4 | Itga1 | Cd28 | Rxfp2 | F2r | Ctsb | Mc1r | Prlr | C1qtnf4 | Cux2 | Agpat1 | Vamp2 |
| Cyp7b1 | Ccnd1 | Trim24 | Kdm2b | Plek2 | Timm17a | Prom1 | Sort1 | Abcd2 | Abcd2 | C2orf61 | Nfat5 | Dcstamp | Sox12 |  |
| Positive Regulation of Biological Process | | | | | | | | | | | | | | |
| Adra2a | Tdl | Fgf6 | Rtn4 | Itga1 | Cd28 | Rxfp2 | F2r | Ctsb | Mc1r | Prlr | C1qtnf4 | Cux2 | Agpat1 | Vamp2 |
| Cyp7b1 | Ccnd1 | Trim24 | Kdm2b | Plek2 | Timm17a | Prom1 | Sort1 | Abcd2 | Abcd2 | C2orf61 | Nfat5 | Dcstamp | Sox12 | Susd4 |
| Local Network Cluster (String) | | | | | | | | | | | | | | |
| Activated Point Mutants of Fgfr2, and Fibroblast Growth Factor-Activated Receptor Activity | | | | | | | | | | | | | | |
| Trim24 | Fgf6 | Frs3 |  |  |  |  |  |  |  |  |  |  |  |  |
| Kegg Pathways | | | | | | | | | | | | | | |
| Pi3k-Akt Signaling Pathway | | | | | | | | | | | | | | |
| Prlr | Fgf6 | Itga1 | F2r | Lama3 | Gng4 | Ccnd1 |  |  |  |  |  |  |  |  |
| Lysosome | | |  | | |  | | |  | | |  | | |
| Atp6v0d2 | Ctsb | Sort1 | Arsa |  |  |  |  |  |  |  |  |  |  |  |
| Protein Domains (Pfam) | | | | | | | | | | | | | | |
| Striatin Family | | | | | | | | | | | | | | |
| Strn | Strn4 |  |  |  |  |  |  |  |  |  |  |  |  |  |

**Table S25. EDEGs in X chromosomes.**

| Tissues | EDEGs |
| --- | --- |
| Adrenal | ***Xist, Eif2s3x, Kdm6a, Kdm5c****, Ar, Apln, Cited1, Hs6st2, Il13ra1, Nr0b1, Spry3* |
| Amygdala | ***Xist, Eif2s3x, Ddx3x, Kdm5c*** |
| Hypothalamus | ***Xist, Eif2s3x, Kdm6a, Kdm5c, Ddx3x*** |
| Kidney | ***Xist*** |
| Liver | ***Xist, Eif2s3x, Kdm6a****, Maob, Mllt7, Nxf7, Syn1, Klhl13, 2210013O21Rik, 4933416I08Rik, 5031408O05, Alas2, Apex2* |
| Pituitary | ***Xist, Eif2s3x, Kdm6a, Kdm5c, Ddx3x****, Ar, Maob, 2610029G23Rik, Frmpd4, Gucy2f, Il1rapl2, Mbnl3, Pcdh11x, Rab9b, Serpina7, Sh3kbp1, Tspan7* |
| Spleen | ***Xist, Eif2s3x, Kdm6a*** |

**Table S26:** **SNPs and its corresponding genes locates in significant e-QTL of *Kdm5c* in female amygdala.**

| Source WebQTL, The GeneNetwork (httpwww.genenetwork.org) | | | | | | | |
| --- | --- | --- | --- | --- | --- | --- | --- |
| Trait ID INIA Amygdala Affy MoGene 1.0 ST (Nov10) RMA Female 10602644 | | | | | | | |
| Significant LRS = 17.62 | | | | | | | |
| Index | **Locus** | **cM** | **Mb** | **LRS** | **P-value** | **Additive** | **Genes** |
| 1 | rs46667062 | 59.89 | 134.523 | 18.739 | 0.039 | 0.043 | none |
| 2 | rs37495061 | 59.89 | 135.171 | 18.739 | 0.039 | 0.043 | none |
| 3 | rs30026548 | 60.01 | 135.444 | 18.739 | 0.039 | 0.043 | *Ube2d3* |
| 4 | rs30854594 | 60.01 | 135.471 | 18.739 | 0.039 | 0.043 | none |
| 5 | rs30657646 | 60.4 | 135.953 | 18.739 | 0.039 | 0.043 | none |
| 6 | rs30788144 | 60.4 | 136.706 | 18.739 | 0.039 | 0.043 | *Ppp3ca* |
| 7 | rs30809559 | 60.53 | 136.709 | 18.739 | 0.039 | 0.043 | *Ppp3ca* |
| 8 | rs30814711 | 60.66 | 136.919 | 18.739 | 0.039 | 0.043 | *Ppp3ca* |
| 9 | rs30258925 | 60.66 | 137.126 | 18.739 | 0.039 | 0.043 | none |
| 10 | rs30510683 | 60.78 | 137.158 | 18.739 | 0.039 | 0.043 | none |
| 11 | rs47741729 | 60.78 | 137.196 | 18.739 | 0.039 | 0.043 | none |
| 12 | rs30597855 | 61.55 | 138.815 | 18.15 | 0.049 | 0.042 | *Tspan5* |

**Table S27.** **SNPs and its corresponding genes locate in significant e-QTL of *Kdm5c* in male amygdala.**

| Source: WebQTL, The GeneNetwork (http://www.genenetwork.org) | | | | | | | |
| --- | --- | --- | --- | --- | --- | --- | --- |
| Trait ID: INIA Amygdala Affy MoGene 1.0 ST (Nov10) RMA Male : 10602644 | | | | | | | |
| Significant LRS = 17.20 | | | | | | | |
| INDEX | **Locus** | **cM** | **Mb** | **LRS** | **P-value** | **Additive** | **Genes** |
| 1 | rs6404215 | 5.62 | 13.998 | 17.444 | 0.04 | 0.05 | None |
| 2 | rs3693453 | 5.62 | 14.164 | 17.444 | 0.04 | 0.05 | *Sema3e* |
| 3 | rs29202009 | 5.87 | 14.23 | 17.493 | 0.04 | 0.051 | *Sema3e* |
| 4 | rs31709594 | 6 | 14.231 | 17.493 | 0.04 | 0.051 | *Sema3e* |
| 5 | rs29151778 | 6.79 | 14.676 | 17.493 | 0.04 | 0.051 | *Pclo* |
| 6 | rs29583344 | 6.79 | 16.109 | 17.493 | 0.04 | 0.051 | *Cacna2d1* |

**Table S28.** **SNPs and its corresponding genes locate in significant e-QTL of *Kdm5c* in female liver.**

| Source: WebQTL, The GeneNetwork (http://www.genenetwork.org) | | | | | | | | |
| --- | --- | --- | --- | --- | --- | --- | --- | --- |
| Trait ID: GenEx BXD Sal Liver Affy M430 2.0 (Feb11) RMA Females: 1426498_at | | | | | | | | |
| Significant LRS = 18.21 | | | | | | | | |
| Chr | **Index** | **Locus** | **cM** | **Mb** | **LRS** | **P-value** | **Additive** | **Genes** |
| 3 | 1 | rs30860082 | 41.43 | 105.06 | 18.427 | 0.034 | -0.107 | None |
| 2 | rs13477308 | 41.69 | 105.116 | 18.427 | 0.034 | -0.107 | None |
| 3 | rs13477309 | 41.69 | 105.47 | 18.427 | 0.034 | -0.107 | *Kcnd3* |
| 4 | rs30953849 | 41.82 | 105.668 | 18.427 | 0.034 | -0.107 | *Kcnd3* |
| 5 | rs33666633 | 41.82 | 105.835 | 18.427 | 0.034 | -0.107 | None |
| 6 | rs13477315 | 41.95 | 106.965 | 18.427 | 0.034 | -0.107 | None |
| 7 | 1 | rs32647409 | 60.92 | 120.815 | 24.96 | 0.001 | -0.131 | None |
| 2 | Affy_PC7_129 | 61.17 | 122 | 23.625 | 0.001 | -0.127 | None |
| 3 | rs32356264 | 62.25 | 125.485 | 22.091 | 0.004 | -0.126 | *Nsmce1* |
| 4 | UNC070560009 | 62.25 | 125.706 | 22.091 | 0.004 | -0.126 | None |
| 5 | Affy_PC7_134 | 62.25 | 127.5 | 22.091 | 0.004 | -0.126 | None |
| 8 | 1 | rs33576348 | 22.03 | 57.667 | 18.898 | 0.035 | 0.111 | None |
| 2 | rs51663401 | 22.03 | 60.719 | 18.898 | 0.035 | 0.111 | None |
| 3 | rs51307684 | 22.29 | 61.237 | 18.898 | 0.035 | 0.111 | Sh3rf1 |
| 4 | rs13479791 | 22.29 | 61.373 | 18.898 | 0.035 | 0.111 | Sh3rf2 |
| 5 | rs46264405 | 22.55 | 61.398 | 18.898 | 0.035 | 0.111 | None |

**Table S29: important EDEGs from autosomal and X chromosomes in different tissues.**

| Chromosomes | Autosomal | X |
| --- | --- | --- |
| Adrenal | *Akr1d1* | *Eif2s3x, Ddx3x, Kdm6a, Kdm5c, Xist* |
| *Cyp7b1* |
| *Slc7a13* |
| *Slco1a1* |
| *Rxfp1* |
| Amygdala | *NA* | *Eif2s3x, Ddx3x, Kdm6a, Kdm5c, Xist* |
| Hypothalamus | *NA* | *Eif2s3x, Ddx3x, Kdm6a, Kdm5c, Xist* |
| Kidney | *Cyp7b1* | *Ddx3x, Kdm6a, Kdm5c, Xist* |
| *Slc7a13* |
| *Slco1a1* |
| *Sah* |
| *Akr1d1* |
| *Rxfp1* |
| Liver | *Akr1d1* | *Eif2s3x, Ddx3x, Kdm6a, Kdm5c, Xist* |
| *Cyp7b1* |
| *Slc7a13* |
| *Slco1a1* |
| *Sah* |
| Spleen | *NA* | *Eif2s3x, Ddx3x, Kdm6a, Kdm5c, Xist* |
| Pituitary | *Rxfp1* | *Eif2s3x, Ddx3x, Kdm6a, Kdm5c, Xist* |
| *Cyp7b1* |
| *Slco1a1* |
